# Supplementary material
Source: PubMed Central journal article supplement (PMC4596672)
Supplement: 10.1534_115.181164_genetics.115.181164-1.pdf [file 10.1534_115.181164_genetics.115.181164-1.pdf]

## Supplementary information

Analysis of polygenic mutants suggests a role for Mediator in regulating transcriptional activation distance in *Saccharomyces cerevisiae*

Caitlin T. Reavey\*, Mark J. Hickman<sup>‡</sup>, Krista C. Dobi\*<sup>1</sup>, David Botstein<sup>†2</sup>, and Fred Winston\*

File S1 – PERL script to calculate the frequency of all SNPs in two matched pools

Table S1 – *S. cerevisiae* strains

Table S2 – Oligonucleotides

Table S3 – Crosses for bulk segregant analysis

Table S4 – Sequencing coverage of segregant pools

Table S5 – Causal mutant candidates

Table S6 – Number of mutants with >2-fold change in RNA levels in the polygenic mutants

Table S7 – Adjacent gene pairs enrichment

Figure S1 – Evidence for disomy in two of the polygenic mutants

Figure S2 – Western analysis of Med3

## File S1

PERL script to calculate the frequency of all SNPs in two matched pools

```
# Usage: cerevisiae_VCF_diff <vcf-file> <min-counts> <min-fraction>
# Input file must be a VCF file created from two samples (e.g., WT and mutant).
# When calling the function, the user must specify the minimum reads needed in
each sample
# (this study used 10) and the minimum fraction of an alternative allele
observed in either
# of the two samples (this study used 0.5).
# This program will ask which column is the WT and which column is the mutant.
# Output file is a tab-delimited file with same name as input file, plus the
date.
# Output file contains the allele descriptions and their counts.
# "FRACTION_DIFF_REF" shows the fraction difference of the reference allele: WT
minus mutant.
# The closer this value is to 1 (or -1), the greater the difference between WT
and mutant.

#!/usr/bin/perl
use warnings;
use strict;
use List::Util qw( min max );

my $input = shift;
my $date = ((localtime)[5]+1900)."_" . ((localtime)[4]+1)."_" . ((localtime)[3]);
my $output = $input.$date.".txt";

open IN, $input or die $!;
open OUT, ">$output" or die $!;
select OUT;

my $min_num = shift;
my $min_fraction = shift;

my
%chr=(chrI=>1,chrII=>2,chrIII=>3,chrIV=>4,chrV=>5,chrVI=>6,chrVII=>7,chrVIII=>8,
      chrIX=>9,chrX=>10,chrXI=>11,chrXII=>12,chrXIII=>13,chrXIV=>14,chrXV=>15,chr
rXVI=>16,chrMito=>17,"2-micron"=>18);
my %column;

$/="\n";

my $labels = join "\t", qw/CHROM POS REF_ALLELE ALT_ALLELE1 ALT_ALLELE2
ALT_ALLELE3 NUM_REF_WT NUM_ALT1_WT NUM_ALT2_WT NUM_ALT3_WT NUM_REF_MUT
NUM_ALT1_MUT NUM_ALT2_MUT NUM_ALT3_MUT FRACTION_DIFF_REF/;
print $labels,"\n";

my $WT_column = "-1";
my $mutant_column = "-1";

while (<IN>) {
    my @row = split /\t/, $_;
```

```

my @new_row;

# Meta-information lines
if ($row[0] =~ /^##/) {next;}

# header line: determine order of columns
elsif ($row[0] =~ /^#[A-Za-z0-9]/) {
    my $count=0;

    for (@row) {
        print STDOUT "$count: $_\n";
        $column{$_} = $count;
        $count++;
    }
    print STDOUT "Which column is the WT sample? ";
    chomp ($WT_column = <STDIN>);
    print STDOUT "Which column is the mutant sample? ";
    chomp ($mutant_column = <STDIN>);
    next;
}

# data line (i.e., with mutation)
else {
    $new_row[0] = $chr{$row[$column{"#CHROM"}]};
    $new_row[1] = $row[$column{POS}];
    $new_row[2] = $row[$column{REF}];

    my @MUTATIONS = split /,/, $row[$column{ALT}];
    if (!defined$MUTATIONS[0] || ($MUTATIONS[0] eq "."))
    {$new_row[3] = "";}
    else {$new_row[3]=$MUTATIONS[0];}
    if (!defined$MUTATIONS[1] || ($MUTATIONS[1] eq "."))
    {$new_row[4] = "";}
    else {$new_row[4]=$MUTATIONS[1];}
    if (!defined$MUTATIONS[2] || ($MUTATIONS[2] eq "."))
    {$new_row[5] = "";}
    else {$new_row[5]=$MUTATIONS[2];}

    my %format_column;
    my @format = split /:/, $row[$column{FORMAT}];
    my $count=0;
    my $RA="RA"; my $AA="AA";
    for (@format) {
        $format_column{$_} = $count;
        if ($_ eq "RO") { $RA = "RO"; }
        if ($_ eq "AO") { $AA = "AO"; }
        $count++;
    }

    if ($row[$WT_column] =~ /:/) {
        my @WT = split /:/, $row[$WT_column];
        chomp (@WT);
        $new_row[6] = $WT[$format_column{$RA}];
        my @AA1 = split /,/, $WT[$format_column{$AA}];

```

```

        if (!defined$AA1[0] || ($AA1[0] eq "."))      {$new_row[7] =
0;}
        else {$new_row[7]=$AA1[0];}
        if (!defined$AA1[1] || ($AA1[1] eq "."))      {$new_row[8] =
0;}
        else {$new_row[8]=$AA1[1];}
        if (!defined$AA1[2] || ($AA1[2] eq "."))      {$new_row[9] =
0;}
        else {$new_row[9]=$AA1[2];}
    }
    else {
        @new_row[6..9] = ("?", "?", "?", "?");
    }

    if ($row[$mutant_column] =~ /:/) {
        my @MUT = split /:/, $row[$mutant_column];
        chomp (@MUT);
        $new_row[10] = $MUT[$format_column{$RA}];
        my @AA2 = split /,/, $MUT[$format_column{$AA}];
0;}
        if (!defined$AA2[0] || ($AA2[0] eq "."))      {$new_row[11] =
0;}
        else {$new_row[11]=$AA2[0];}
        if (!defined$AA2[1] || ($AA2[1] eq "."))      {$new_row[12] =
0;}
        else {$new_row[12]=$AA2[1];}
        if (!defined$AA2[2] || ($AA2[2] eq "."))      {$new_row[13] =
0;}
        else {$new_row[13]=$AA2[2];}
    }
    else {
        @new_row[10..13] = ("?", "?", "?", "?");
    }
}

my $WT_sum = 0;
my $mut_sum = 0;

for (@new_row[6..9]) {
    if ($_ ne "?") {$WT_sum=$WT_sum+$_;}
}
for (@new_row[10..13]) {
    if ($_ ne "?") {$mut_sum=$mut_sum+$_;}
}

if ( $WT_sum >= $min_num && $mut_sum >= $min_num ) {
    if ( ( ( max(@new_row[7..9]) / $WT_sum) >= $min_fraction) ||
        ( ( max(@new_row[11..13]) / $mut_sum) >= $min_fraction) ) {
        $new_row[14] = ($new_row[6]/$WT_sum)-($new_row[10]/$mut_sum);
        my $line = join "\t", @new_row;
        print $line, "\n";
    }
}
}
}

```

**Table S1. *S. cerevisiae* strains**

| Strain        | Genotype                                                                                                                                                                                             |
|---------------|------------------------------------------------------------------------------------------------------------------------------------------------------------------------------------------------------|
| FY76          | <i>MATa lys2-128δ</i>                                                                                                                                                                                |
| FY3045        | <i>MATa his3Δ200 ura3Δ0 leu2Δ0 trp1Δ63 lys2-128δ bph1Δ::kanMX-UAS<sub>GAL1</sub> 799-HIS3 dug2Δ::TRP1-UAS<sub>GAL1</sub>806-URA3-natMX</i>                                                           |
| FY3046 (2.0)  | <i>MATa his3Δ200 ura3Δ0 leu2Δ0 trp1Δ63 lys2-128δ sin4Δ0::LEU2 bph1Δ::kanMX-UAS<sub>GAL1</sub> 799-HIS3 dug2Δ::TRP1-UAS<sub>GAL1</sub>806-URA3-natMX</i>                                              |
| FY3047 (1.0)  | <i>MATα his3Δ200 ura3Δ0 leu2Δ0 trp1Δ63 lys2-128δ sin4Δ0::LEU2 bph1Δ::kanMX-UAS<sub>GAL1</sub> 799-HIS3 dug2Δ::TRP1-UAS<sub>GAL1</sub>806-URA3-natMX</i>                                              |
| FY3048 (1.1)  | <i>MATα his3Δ200 ura3Δ0 leu2Δ0 trp1Δ63 lys2-128δ sin4Δ0::LEU2 bph1Δ::kanMX-UAS<sub>GAL1</sub> 799-HIS3 dug2Δ::TRP1-UAS<sub>GAL1</sub>806-URA3-natMX grr1-1</i>                                       |
| FY3049 (1.2)  | <i>MATα his3Δ200 ura3Δ0 leu2Δ0 trp1Δ63 lys2-128δ sin4Δ0::LEU2 bph1Δ::kanMX-UAS<sub>GAL1</sub> 799-HIS3 dug2Δ::TRP1-UAS<sub>GAL1</sub>806-URA3-natMX mot3-1 grr1-1 sgm1-1 rim8-1 tma108-1 sgf73-1</i> |
| FY3050 (2.1)  | <i>MATa his3Δ200 ura3Δ0 leu2Δ0 trp1Δ63 lys2-128δ sin4Δ0::LEU2 bph1Δ::kanMX-UAS<sub>GAL1</sub> 799-HIS3 dug2Δ::TRP1-UAS<sub>GAL1</sub>806-URA3-natMX yor019w-1</i>                                    |
| FY3051 (2.2)  | <i>MATa his3Δ200 ura3Δ0 leu2Δ0 trp1Δ63 lys2-128δ sin4Δ0::LEU2 bph1Δ::kanMX-UAS<sub>GAL1</sub> 799-HIS3 dug2Δ::TRP1-UAS<sub>GAL1</sub>806-URA3-natMX ptr3-1 yor019w-1</i>                             |
| FY3052 (2.3a) | <i>MATa his3Δ200 ura3Δ0 leu2Δ0 trp1Δ63 lys2-128δ sin4Δ0::LEU2 bph1Δ::kanMX-UAS<sub>GAL1</sub> 799-HIS3 dug2Δ::TRP1-UAS<sub>GAL1</sub>806-URA3-natMX mit1-1 ptr3-1 yor019w-1</i>                      |
| FY3053 (2.3b) | <i>MATa his3Δ200 ura3Δ0 leu2Δ0 trp1Δ63 lys2-128δ sin4Δ0::LEU2 bph1Δ::kanMX-UAS<sub>GAL1</sub> 799-HIS3 dug2Δ::TRP1-UAS<sub>GAL1</sub>806-URA3-natMX msn2-1 ptr3-1</i>                                |

*yor019w-1*

- FY3054 *MATa his3Δ200 ura3Δ0 leu2Δ0 lys2-128δ bph1Δ::kanMX-UAS<sub>GAL1</sub> 799-HIS3 dug2Δ::TRP1-UAS<sub>GAL1</sub>806*
- FY3055 *MATa his3Δ200 ura3Δ0 leu2Δ0 trp1Δ63 lys2-128δ sin4Δ0::LEU2 bph1Δ::kanMX-UAS<sub>GAL1</sub> 799-HIS3 dug2Δ::TRP1-UAS<sub>GAL1</sub>806-URA3*
- FY3056 *MATα his3Δ200 ura3Δ0 leu2Δ0 trp1Δ63 lys2-128δ sin4Δ0::LEU2 bph1Δ::kanMX-UAS<sub>GAL1</sub> 799-HIS3 dug2Δ::TRP1-UAS<sub>GAL1</sub>806 mot3-1 grr1-1 sgm1-1 rim8-1 tma108-1 sgf73-1*
- FY3057 *MATa his3Δ200 ura3Δ0 leu2Δ0 trp1Δ63 lys2-128δ sin4Δ0::LEU2 bph1Δ::kanMX-UAS<sub>GAL1</sub> 799-HIS3 dug2Δ::TRP1-UAS<sub>GAL1</sub>806 mit1-1 ptr3-1 yor019w-1*
- FY3058 *MATa his3Δ200 ura3Δ0 leu2Δ0 trp1Δ63 lys2-128δ sin4Δ0::LEU2 bph1Δ::kanMX-UAS<sub>GAL1</sub> 799-HIS3 dug2Δ::TRP1-UAS<sub>GAL1</sub>806 msn2-1 ptr3-1 yor019w-1*
- FY3059 *MATa his3Δ200 ura3Δ0 leu2Δ0 trp1Δ63 lys2-128δ sin4Δ0::LEU2 bph1Δ::kanMX-UAS<sub>GAL1</sub> 799-HIS3 dug2Δ::TRP1-UAS<sub>GAL1</sub>806 mot3- 1*
- FY3060 *MATa his3Δ200 ura3Δ0 leu2Δ0 trp1Δ63 lys2-128δ sin4Δ0::LEU2 bph1Δ::kanMX-UAS<sub>GAL1</sub> 799-HIS3 dug2Δ::TRP1-UAS<sub>GAL1</sub>806 grr1-531*
- FY3061 *MATα his3Δ200 ura3Δ0 leu2Δ0 trp1Δ63 lys2-128δ sin4Δ0::LEU2 bph1Δ::kanMX-UAS<sub>GAL1</sub> 799-HIS3 dug2Δ::TRP1-UAS<sub>GAL1</sub>806 mot3-1 grr1-1*
- FY3062 *MATα his3Δ200 ura3Δ0 leu2Δ0 trp1Δ63 lys2-128δ bph1Δ::kanMX-UAS<sub>GAL1</sub> 799-HIS3 dug2Δ::TRP1-UAS<sub>GAL1</sub>806 mot3-1 grr1-1*
- FY3063 *MATα his3Δ200 ura3Δ0 leu2Δ0 trp1Δ63 lys2-128δ sin4Δ0::LEU2 bph1Δ::kanMX-UAS<sub>GAL1</sub> 799-HIS3 dug2Δ::TRP1-UAS<sub>GAL1</sub>806 mot3-1 msn2-1*
- FY3064 *MATa his3Δ200 ura3Δ0 leu2Δ0 trp1Δ63 lys2-128δ sin4Δ0::LEU2 bph1Δ::kanMX-UAS<sub>GAL1</sub> 799-HIS3 dug2Δ::TRP1-UAS<sub>GAL1</sub>806 msn2-1 sin4Δ0*

FY3065 *MAT $\alpha$  his3 $\Delta$ 200 ura3 $\Delta$ 0 leu2 $\Delta$ 0 trp1 $\Delta$ 63 lys2-128 $\delta$  sin4 $\Delta$ 0::LEU2 bph1 $\Delta$ ::kanMX-UASGAL1 799-HIS3 dug2 $\Delta$ ::TRP1-UASGAL1806 mit1-1 msn2-1*

FY3066 *MATa his3 $\Delta$ 200 ura3 $\Delta$ 0 leu2 $\Delta$ 0 trp1 $\Delta$ 63 lys2-128 $\delta$  sin4 $\Delta$ 0::LEU2 bph1 $\Delta$ ::kanMX-UASGAL1 799-HIS3 dug2 $\Delta$ ::TRP1-UASGAL1806 mit1-1 sin4 $\Delta$ 0*

FY3067 *MAT $\alpha$  his3 $\Delta$ 200 ura3 $\Delta$ 0 leu2 $\Delta$ 0 trp1 $\Delta$ 63 lys2-128 $\delta$  sin4 $\Delta$ 0::LEU2 bph1 $\Delta$ ::kanMX-UASGAL1 799-HIS3 dug2 $\Delta$ ::TRP1-UASGAL1806 mot3-1 mit1-1*

FY3068 *MAT $\alpha$  his3 $\Delta$ 200 ura3 $\Delta$ 0 leu2 $\Delta$ 0 trp1 $\Delta$ 63 lys2-128 $\delta$  sin4 $\Delta$ 0::LEU2 bph1 $\Delta$ ::kanMX-UASGAL1 799-HIS3 dug2 $\Delta$ ::TRP1-UASGAL1806 mot3-1 mit1-1 msn2-1*

FY3069 *MATa his3 $\Delta$ 200 ura3 $\Delta$ 0 leu2 $\Delta$ 0 trp1 $\Delta$ 63 lys2-128 $\delta$  sin4 $\Delta$ 0::LEU2 bph1 $\Delta$ ::kanMX-UAS<sub>GAL1</sub> 799-HIS3 dug2 $\Delta$ ::TRP1-UAS<sub>GAL1</sub>806 MIT1 ptr3-1 yor019w-1*

FY3070 *MATa his3 $\Delta$ 200 ura3 $\Delta$ 0 leu2 $\Delta$ 0 trp1 $\Delta$ 63 lys2-128 $\delta$  sin4 $\Delta$ 0::LEU2 bph1 $\Delta$ ::kanMX-UAS<sub>GAL1</sub> 799-HIS3 dug2 $\Delta$ ::TRP1-UAS<sub>GAL1</sub>806 mit1-1 PTR3 yor019w-1*

FY3071 *MATa his3 $\Delta$ 200 ura3 $\Delta$ 0 leu2 $\Delta$ 0 trp1 $\Delta$ 63 lys2-128 $\delta$  sin4 $\Delta$ 0::LEU2 bph1 $\Delta$ ::kanMX-UAS<sub>GAL1</sub> 799-HIS3 dug2 $\Delta$ ::TRP1-UAS<sub>GAL1</sub>806 mit1-1 ptr3-1 YOR019W*

FY3072 *MATa his3 $\Delta$ 200 ura3 $\Delta$ 0 leu2 $\Delta$ 0 trp1 $\Delta$ 63 lys2-128 $\delta$  sin4 $\Delta$ 0::LEU2 bph1 $\Delta$ ::kanMX-UAS<sub>GAL1</sub> 799-HIS3 dug2  $\Delta$ ::TRP1-UAS<sub>GAL1</sub>806 MSN2 ptr3-1 yor019w-1*

FY3073 *MATa his3 $\Delta$ 200 ura3 $\Delta$ 0 leu2 $\Delta$ 0 trp1 $\Delta$ 63 lys2-128 $\delta$  sin4 $\Delta$ 0::LEU2 bph1 $\Delta$ ::kanMX-UAS<sub>GAL1</sub> 799-HIS3 dug2  $\Delta$ ::TRP1-UAS<sub>GAL1</sub>806 msn2-1 PTR3 yor019w-1*

FY3074 *MATa his3 $\Delta$ 200 ura3 $\Delta$ 0 leu2 $\Delta$ 0 trp1 $\Delta$ 63 lys2-128 $\delta$  sin4 $\Delta$ 0::LEU2 bph1 $\Delta$ ::kanMX-UAS<sub>GAL1</sub> 799-HIS3 dug2  $\Delta$ ::TRP1-UAS<sub>GAL1</sub>806 msn2-1 ptr3-1 YOR019W*

FY3075 *MAT $\alpha$  his3 $\Delta$ 200 ura3 $\Delta$ 0 leu2 $\Delta$ 0 trp1 $\Delta$ 63 lys2-128 $\delta$  sin4 $\Delta$ 0::LEU2 bph1 $\Delta$ ::kanMX-UAS<sub>GAL1</sub> 799-HIS3 dug2 $\Delta$ ::TRP1-UAS<sub>GAL1</sub>806 mot3 $\Delta$ 0::URA3 grr1-1*

FY3076 *MAT $\alpha$  his3 $\Delta$ 200 ura3 $\Delta$ 0 leu2 $\Delta$ 0 trp1 $\Delta$ 63 lys2-128 $\delta$  sin4 $\Delta$ 0::LEU2 bph1 $\Delta$ ::kanMX-UAS<sub>GAL1</sub> 799-HIS3 dug2 $\Delta$ ::TRP1-UAS<sub>GAL1</sub>806 mot3-1 grr1 $\Delta$ 0::URA3*

FY3077 *MATa his3Δ200 ura3Δ0 leu2Δ0 trp1Δ63 lys2-128δ sin4Δ0::LEU2 bph1Δ::kanMX-UAS<sub>GAL1</sub> 799-HIS3 dug2Δ::TRP1-UAS<sub>GAL1</sub>806 mit1Δ0::URA3 ptr3-1 yor019w-1*

FY3078 *MATa his3Δ200 ura3Δ0 leu2Δ0 trp1Δ63 lys2-128δ sin4Δ0::LEU2 bph1Δ::kanMX-UAS<sub>GAL1</sub> 799-HIS3 dug2Δ::TRP1-UAS<sub>GAL1</sub>806 mit1-1 ptr3Δ0::URA3 yor019w-1*

FY3079 *MATa his3Δ200 ura3Δ0 leu2Δ0 trp1Δ63 lys2-128δ sin4Δ0::LEU2 bph1Δ::kanMX-UAS<sub>GAL1</sub> 799-HIS3 dug2Δ::TRP1-UAS<sub>GAL1</sub>806 msn2Δ0::URA3 ptr3-1 yor019w-1*

FY3080 *MATa his3Δ200 ura3Δ0 leu2Δ0 trp1Δ63 lys2-128δ sin4Δ0::LEU2 bph1Δ::kanMX-UAS<sub>GAL1</sub> 799-HIS3 dug2Δ::TRP1-UAS<sub>GAL1</sub>806 msn2-1 ptr3-Δ0::URA3 yor019w-1*

FY3081 *MATa his3Δ200 ura3Δ0 leu2Δ0 lys2-128δ bph1Δ::kanMX-UAS<sub>GAL1</sub>280-HIS3 dug2Δ::TRP1-UAS<sub>GAL1</sub>806*

FY3082 *MATa his3Δ200 ura3Δ0 leu2Δ0 lys2-128δ bph1Δ::kanMX-UAS<sub>GAL1</sub>1397-HIS3 dug2Δ::TRP1-UAS<sub>GAL1</sub>806*

FY3083 *MATa his3Δ200 ura3Δ0 leu2Δ0 lys2-128δ bph1Δ::kanMX-UAS<sub>GAL1</sub>2027-HIS3 dug2Δ::TRP1-UAS<sub>GAL1</sub>806*

FY3084 *MATa his3Δ200 ura3Δ0 leu2Δ0 trp1Δ63 lys2-128δ sin4Δ0::LEU2 bph1Δ::kanMX-UAS<sub>GAL1</sub>280-HIS3 dug2Δ::TRP1-UAS<sub>GAL1</sub>806-URA3*

FY3085 *MATa his3Δ200 ura3Δ0 leu2Δ0 trp1Δ63 lys2-128δ sin4Δ0::LEU2 bph1Δ::kanMX-UAS<sub>GAL1</sub>1397-HIS3 dug2Δ::TRP1-UAS<sub>GAL1</sub>806-URA3*

FY3086 *MATa his3Δ200 ura3Δ0 leu2Δ0 trp1Δ63 lys2-128δ sin4Δ0::LEU2 bph1Δ::kanMX-UAS<sub>GAL1</sub>2027-HIS3 dug2 Δ::TRP1-UAS<sub>GAL1</sub>806-URA3*

FY3087 *MATα his3Δ200 ura3Δ0 leu2Δ0 trp1Δ63 lys2-128δ sin4Δ0::LEU2 bph1Δ::kanMX-UAS<sub>GAL1</sub>280-HIS3 dug2Δ::TRP1-UAS<sub>GAL1</sub>806 mot3-1 grr1-1*

FY3088 *MATα his3Δ200 ura3Δ0 leu2Δ0 trp1Δ63 lys2-128δ sin4Δ0::LEU2 bph1Δ::kanMX-UAS<sub>GAL1</sub>1397-HIS3 dug2Δ::TRP1-UAS<sub>GAL1</sub>806 mot3-1 grr1-1*



FY3089 *MAT $\alpha$  his3 $\Delta$ 200 ura3 $\Delta$ 0 leu2 $\Delta$ 0 trp1 $\Delta$ 63 lys2-128 $\delta$  sin4 $\Delta$ 0::LEU2 bph1 $\Delta$ ::kanMX-UAS<sub>GAL1</sub>2027-HIS3 dug2 $\Delta$ ::TRP1-UAS<sub>GAL1</sub>806 mot3-1 grr1-1*

FY3090 *MAT $\alpha$  his3 $\Delta$ 200 ura3 $\Delta$ 0 leu2 $\Delta$ 0 trp1 $\Delta$ 63 lys2-128 $\delta$  sin4 $\Delta$ 0::LEU2 bph1 $\Delta$ ::kanMX-UAS<sub>GAL1</sub>280-HIS3 dug2 $\Delta$ ::TRP1-UAS<sub>GAL1</sub>806 mit1-1 ptr3-1 yor019w-1*

FY3091 *MAT $\alpha$  his3 $\Delta$ 200 ura3 $\Delta$ 0 leu2 $\Delta$ 0 trp1 $\Delta$ 63 lys2-128 $\delta$  sin4 $\Delta$ 0::LEU2 bph1 $\Delta$ ::kanMX-UAS<sub>GAL1</sub>1397-HIS3 dug2 $\Delta$ ::TRP1-UAS<sub>GAL1</sub>806 mit1-1 ptr3-1 yor019w-1*

FY3092 *MAT $\alpha$  his3 $\Delta$ 200 ura3 $\Delta$ 0 leu2 $\Delta$ 0 trp1 $\Delta$ 63 lys2-128 $\delta$  sin4 $\Delta$ 0::LEU2 bph1 $\Delta$ ::kanMX-UAS<sub>GAL1</sub>2027-HIS3 dug2 $\Delta$ ::TRP1-UAS<sub>GAL1</sub>806 mit1-1 ptr3-1 yor019w-1*

FY3093 *MAT $\alpha$  his3 $\Delta$ 200 ura3 $\Delta$ 0 leu2 $\Delta$ 0 trp1 $\Delta$ 63 lys2-128 $\delta$  sin4 $\Delta$ 0::LEU2 bph1 $\Delta$ ::kanMX-UAS<sub>GAL1</sub>280-HIS3 dug2 $\Delta$ ::TRP1-UAS<sub>GAL1</sub>806 msn2-1 ptr3-1 yor019w-1*

FY3094 *MAT $\alpha$  his3 $\Delta$ 200 ura3 $\Delta$ 0 leu2 $\Delta$ 0 trp1 $\Delta$ 63 lys2-128 $\delta$  sin4 $\Delta$ 0::LEU2 bph1 $\Delta$ ::kanMX-UAS<sub>GAL1</sub>1397-HIS3 dug2 $\Delta$ ::TRP1-UAS<sub>GAL1</sub>806 msn2-1 ptr3-1 yor019w-1*

FY3095 *MAT $\alpha$  his3 $\Delta$ 200 ura3 $\Delta$ 0 leu2 $\Delta$ 0 trp1 $\Delta$ 63 lys2-128 $\delta$  sin4 $\Delta$ 0::LEU2 bph1 $\Delta$ ::kanMX-UAS<sub>GAL1</sub>2027-HIS3 dug2 $\Delta$ ::TRP1-UAS<sub>GAL1</sub>806 msn2-1 ptr3-1 yor019w-1*

FY3096 *MAT $\alpha$  his3 $\Delta$ 200 ura3 $\Delta$ 0 leu2 $\Delta$ 0 lys2-128 $\delta$  bph1 $\Delta$ ::kanMX-UAS<sub>GAL1</sub> 799-HIS3 dug2 $\Delta$ ::TRP1-UAS<sub>GAL1</sub>806 UAS<sub>GAL1</sub>-10 $\Delta$ ::hphMX*

FY3097 *MAT $\alpha$  his3 $\Delta$ 200 ura3 $\Delta$ 0 leu2 $\Delta$ 0 lys2-128 $\delta$  bph1 $\Delta$ ::kanMX-UAS<sub>GAL1</sub> 799-HIS3 dug2 $\Delta$ ::TRP1-UAS<sub>GAL1</sub>806 UAS<sub>GAL1</sub>-10 $\Delta$ ::hphMX MED3-FLAG::natMX*

FY3098 *MAT $\alpha$  his3 $\Delta$ 200 ura3 $\Delta$ 0 leu2 $\Delta$ 0 lys2-128 $\delta$  bph1 $\Delta$ ::kanMX-UAS<sub>GAL1</sub> 799-HIS3 dug2 $\Delta$ ::TRP1-UAS<sub>GAL1</sub>806 UAS<sub>GAL1</sub>-10 $\Delta$ ::hphMX sin4 $\Delta$ 0::LEU2*

FY3099 *MAT $\alpha$  his3 $\Delta$ 200 ura3 $\Delta$ 0 leu2 $\Delta$ 0 lys2-128 $\delta$  bph1 $\Delta$ ::kanMX-UAS<sub>GAL1</sub> 799-HIS3 dug2 $\Delta$ ::TRP1-UAS<sub>GAL1</sub>806 UAS<sub>GAL1</sub>-10 $\Delta$ ::hphMX sin4 $\Delta$ 0::LEU2 MED3-FLAG::NatMX*

FY3100 *MAT $\alpha$  his3 $\Delta$ 200 ura3 $\Delta$ 0 leu2 $\Delta$ 0 lys2-128 $\delta$  bph1 $\Delta$ ::kanMX-UAS<sub>GAL1</sub> 799-HIS3*

*dug2Δ::TRP1-UAS<sub>GAL1</sub>806 UAS<sub>GAL1</sub>-10Δ::hphMX sin4Δ0::LEU2 mot3-1 grr1-1*  
 FY3101 *MATa his3Δ200 ura3Δ0 leu2Δ0 lys2-128δ bph1Δ::kanMX-UAS<sub>GAL1</sub>799 dug2*  
*Δ::TRP1-UAS<sub>GAL1</sub>806 UAS<sub>GAL1</sub>-10Δ::hphMX sin4Δ0::LEU2 mot3-1 grr1-1 MED3-*  
*FLAG::NatMX*  
 FY3102 *MATα his3Δ200 ura3Δ0 leu2Δ0 trp1Δ63 lys2-128δ sin4Δ0::LEU2 bph1Δ::kanMX-*  
*UAS<sub>GAL1</sub> 799-HIS3 dug2Δ::TRP1-UAS<sub>GAL1</sub>806 MOT3 grr1-1 sgm1-1 rim8-1 tma108-*  
*1 sgf73-1*  
 FY3103 *MATα his3Δ200 ura3Δ0 leu2Δ0 trp1Δ63 lys2-128δ sin4Δ0::LEU2 bph1Δ::kanMX-*  
*UAS<sub>GAL1</sub>799-HIS3 dug2Δ::TRP1-UAS<sub>GAL1</sub>806 mot3-1 GRR1 sgm1-1 rim8-1 tma108-*  
*1 sgf73-1*  
 FY3104 *MATα his3Δ200 ura3Δ0 leu2Δ0 trp1Δ63 lys2-128δ sin4Δ0::LEU2 bph1Δ::kanMX-*  
*UAS<sub>GAL1</sub> 799-HIS3 dug2Δ::TRP1-UAS<sub>GAL1</sub>806 mot3-1 grr1-1 SGM1 rim8-1 tma108-*  
*1 sgf73-1*  
 FY3105 *MATα his3Δ200 ura3Δ0 leu2Δ0 trp1Δ63 lys2-128δ sin4Δ0::LEU2 bph1Δ::kanMX-*  
*UAS<sub>GAL1</sub>799 dug2Δ::TRP1-UAS<sub>GAL1</sub>806-URA3 ptr3-1*  
 FY3106 *MATa his3Δ200 ura3Δ0 leu2Δ0 trp1Δ63 lys2-128δ sin4Δ0::LEU2 bph1Δ::kanMX-*  
*UAS<sub>GAL1</sub> 799-HIS3 dug2Δ::TRP1-UAS<sub>GAL1</sub>806-URA3 yor019w-1-1*  
 FY3107 *MATα his3Δ200 ura3Δ0 leu2Δ0 trp1Δ63 lys2-128δ sin4Δ0::LEU2 bph1Δ::kanMX-*  
*UAS<sub>GAL1</sub>799 dug2Δ::TRP1-UAS<sub>GAL1</sub>806-URA3 ptr3-1 yor019w-1*  
 FY3108 *MATα his3Δ200 ura3Δ0 leu2Δ0 trp1Δ63 lys2-128δ sin4Δ0::LEU2 bph1Δ::kanMX-*  
*UAS<sub>GAL1</sub> 799-HIS3 dug2Δ::TRP1-UAS<sub>GAL1</sub>806-URA3 mit1-1 ptr3-1 yor019w-1*  
 FY3109 *MATα his3Δ200 ura3Δ0 leu2Δ0 trp1Δ63 lys2-128δ sin4Δ0::LEU2 bph1Δ::kanMX-*  
*UAS<sub>GAL1</sub> 799-HIS3 dug2Δ::TRP1-UAS<sub>GAL1</sub>806-URA3 msn2-1 ptr3-1 yor019w-1*  
 FY2650 *MATa his3Δ200 lys2-128d leu2Δ0 ura3Δ0 trp1Δ63 sin4Δ0::LEU2 med3Δ0::LEU2*

*bph1Δ::kanMX-UAS<sub>GAL1</sub>799-HIS3*

FY2651 *MATa ade8-140 his3Δ200 lys2-128d leu2Δ0 ura3Δ0 trp1Δ63 sin4Δ0::LEU2*

*med2Δ0::URA3 bph1Δ::kanMX-UAS<sub>GAL1</sub>799-HIS3*

FY2657 *MATα ade8-140 his3Δ200 lys2-128d leu2Δ0 ura3Δ0 trp1Δ63 sin4Δ0::LEU2*

*cdk8Δ0::URA3 bph1Δ::kanMX-UAS<sub>GAL1</sub>799-HIS3*

---

Strains isolated during the mutant isolation are indicated by additional numbers in parentheses which indicate the stage when they were isolated. Lineage 1 has strains 1.0, 1.1, and 1.2, and lineage 2 has strains 2.0, 2.1, 2.2, 2.3a, and 2.3b.

**Table S2. Oligonucleotides**

| Oligo  | Purpose                                                              | Sequence                                                         |
|--------|----------------------------------------------------------------------|------------------------------------------------------------------|
| FO8064 | replace <i>HIS3</i> ORF with <i>URA3</i> ORF in <i>dug2</i> reporter | TATACTAAAAAATGAGCAGGCAAGATAAACGAAGGCAAAGATGTCGA<br>AAGCTACATATAA |
| FO8065 | replace <i>HIS3</i> ORF with <i>URA3</i> ORF at <i>dug2</i> reporter | TATATATATCGTATGCTGCAGCTTTAATAATCGGTGTCATTAGTTTT<br>GCTGGCCGCATC  |
| FO6834 | Northern probe of <i>HIS3</i>                                        | GATCTTTCGAACAGGCCGTA                                             |
| FO4995 | Northern probe of <i>HIS3</i>                                        | ACCTTTGGTGGAGGGAACAT                                             |
| FO481  | Northern probe of <i>URA3</i>                                        | CCATGGAGGGCACAGTTAAGCCGC                                         |
| F0483  | Northern probe of <i>URA3</i>                                        | CCCTTCCCTTTGCAAATAGTCCTC                                         |
| FO1324 | Northern probe of <i>SNR190</i>                                      | GGCCCTGATGATAATG                                                 |
| FO1325 | Northern probe of <i>SNR190</i>                                      | GGCTCAGATCTGCATG                                                 |
| FO3662 | delete <i>URA3</i> from <i>dug2</i> reporter                         | GTTGGTTGGGTGACCCAACAAATCAT                                       |
| FO3663 | delete <i>URA3</i> from                                              | CTATTGAATACTTTAGACAAAATCTCA                                      |

*dug2* reporter

FO10433 integrate *URA3* at TCGCAACAAAGACATTTTCTATGCCCTTGGTGCTTAAGCAAGATTGT  
site of *mot3* ACTGAGAGTGCAC  
mutation

FO10434 integrate *URA3* at AATTGTTGTAGTTAAAGATGATGTTGTTTTTCTTGAGTTCCTGTGCGG  
site of *mot3* TATTTACACCG  
mutation

FO10277 replace *URA3* with ACGACAGCACCTAACCATCC  
*mot3* allele

FO10278 replace *URA3* with TCTTCATTTTCGGGAGCTGT  
*mot3* allele

FO10271 integrate *URA3* at AAAAAAATCCAAGAGTTTCTGGTTGTTATAGAGAAACGTAAGATTGTA  
site of *grr1* CTGAGAGTGAC  
mutation

FO10272 integrate *URA3* at TTTAAGGTTGTCTAGCTCAATTCGTTTCAGTATTTTTTTTTCTGTGCGG  
site of *grr1* TATTTACACCG  
mutation

FO10273 replace *URA3* with CGCTGAACGGGATTGACATA  
WT *GRR1* allele

FO10274 replace *URA3* with GCTTGGAATGGCAGTATGCA  
WT *GRR1* allele

FO10435 integrate *URA3* at AAAGAAAAAATGATATTGAAGAAAAATATCAAACCTGCCTAGATTGTA  
site of *sgm1* CTGAGAGTGAC  
mutation

FO10436 integrate *URA3* at GTCTCTCCAAGTCTTTCACTTCCAAAAGTGCCTTCGAATGCTGTGCG  
site of *sgm1* GTATTTACACCG  
mutation

FO10281 replace *URA3* with TCAAAGGCCAACTGGGATAG  
*sgm1* allele

FO10282 replace *URA3* with TCGCCAAGTTTTGACATTGA  
*sgm1* allele

FO10263 integrate *URA3* at AAGCTGAAGAGACCTCCATTCAACTCGATTGAAAATTTACAGATTGTA  
site of *mit1* CTGAGAGTGCAC  
mutation

FO10264 integrate at site of ATTTTGTTTTATATCTTTTACAGAATAATAAGAGACAATACTGTGCGG  
*mit1* mutation TATTTACACCG

FO10265 replace *URA3* with GTA CTGATTCCGCCGTCATT  
*mit1* allele

FO10266 replace *URA3* with TCAGGGGAGTGGAAGAGTTG  
*mit1* allele

FO10431 integrate *URA3* at AACTTCAACCAACTAACAGAGCAATCGTCATCTTCACTCTAGATTGTA  
site of *ptr3* CTGAGAGTGCAC  
mutation

FO10432 integrate *URA3* at TATCAAGAAATCATTGGAAAGTTTGCAAAAACGTTGGCTCCTGTGCG  
site of *ptr3* GTATTTACACCG  
mutation

FO10269 replace *URA3* with GCACATGATCTGGACGAAGA  
*ptr3* allele

|         |                                                                |                                                                  |
|---------|----------------------------------------------------------------|------------------------------------------------------------------|
| FO10270 | replace <i>URA3</i> with<br><i>ptr3</i> allele                 | ATGGGGAATCTCGACACGTA                                             |
| FO10397 | integrate <i>URA3</i> at<br>site of <i>yor019w</i><br>mutation | CCAGCTTTAAGAATGCTTTGATAGGCAATGGGTGCGAAAAAAGATTGT<br>ACTGAGAGTGAC |
| FO10398 | integrate <i>URA3</i> at<br>site of <i>yor019w</i><br>mutation | CTGAGGAAGAATATGGTATTAAAGATTTTCTAAACTTTGTCTGTGCGG<br>TATTTACACCG  |
| FO10363 | replace <i>URA3</i> with<br><i>yor019w</i> allele              | CCCAGCATTCAAGAAGGAAG                                             |
| FO10364 | replace <i>URA3</i> with<br><i>yor019w</i> allele              | GCACCGGCACTTTTAACTTT                                             |
| FO10453 | integrate <i>URA3</i> at<br>site of <i>msn2</i><br>mutation    | AAGTGTCGTAATAGAATCAACAAAGGAACTCGAGGAGAAAAGATTGT<br>ACTGAGAGTGAC  |
| FO10454 | integrate <i>URA3</i> at<br>site of <i>msn2</i><br>mutation    | GGTCGTTTCGTTAGAGTGAACAGATCTCACATGCCTTTTCACTGTGCG<br>GTATTTACACCG |
| FO10451 | replace <i>URA3</i> with<br><i>msn2</i> allele                 | TATCACCATTTCCACAGCA                                              |
| FO10452 | replace <i>URA3</i> with<br><i>msn2</i> allele                 | TGACAAGCAAATGGTCGTTT                                             |
| FO10323 | delete <i>MOT3</i> with<br><i>URA3</i>                         | TAGGCAAATAGTAAAGGGACATATCATATTTGAGCAATGAAGATTGT<br>ACTGAGAGTGAC  |

|         |                                                       |                                                                    |
|---------|-------------------------------------------------------|--------------------------------------------------------------------|
| FO10324 | delete <i>MOT3</i> with<br><i>URA3</i>                | ATGAGTGGGAAGGGATATTTTGTGTGTCTATAAAGTCTATCTGTGCG<br>GTATTTACACCCG   |
| FO10317 | delete <i>GRR1</i> with<br><i>URA3</i>                | AAACAGTTTTGCGTTTTCTTTATACTAAGAAGGTCTATAAGATTGTA<br>CTGAGAGTGCAC    |
| FO10318 | delete <i>GRR1</i> with<br><i>URA3</i>                | AAAGGTGTAGTAGGACAGTAAGTATTCAATGAAATACAACCTGTGCGG<br>TATTTACACCCG   |
| FO10519 | delete <i>MIT1</i> with<br><i>URA3</i>                | CAACATTTCAACTAGACACAAGGACAACGTAAATTTCTAAAGATTGTA<br>CTGAGAGTGCAC   |
| FO10520 | delete <i>MIT1</i> with<br><i>URA3</i>                | AAGAAAAGAAAATCGGAGTACTTTTTTAAAATATATTTACCTGTGCGG<br>TATTTACACCCG   |
| FO10521 | delete <i>PTR3</i> with<br><i>URA3</i>                | ACACATACATAGGTACGAAATACACAACCTGATAGGCGTTCAGATTGT<br>ACTGAGAGTGCAC  |
| FO10522 | delete <i>PTR3</i> with<br><i>URA3</i>                | GTATACCAGAACCTTAAACATACGTATATATTTAGATGCACTGTGCG<br>GTATTTACACCCG   |
| FO7014  | delete <i>MSN2</i> with<br><i>URA3</i>                | TTTTTCAACTTTTATTGCTCATAGAAGAACTAGATCTAAAAGATTGTAC<br>TGAGAGTGCAC   |
| FO7015  | delete <i>MSN2</i> with<br><i>URA3</i>                | TTATGAAGAAAGATCTATCGAATTAATAAATAATGGGGTCTACTGTGCG<br>GTATTTACACCCG |
| FO7018  | delete <i>MSN4</i> with<br><i>URA3</i>                | TTCGGCTTTTTTTCTTTTCTTCTTATTAATAAACAATATAAGATTGTAC<br>TGAGAGTGCAC   |
| FO7019  | delete <i>MSN4</i> with<br><i>URA3</i>                | TAGCTTGTCTTGCTTTTATTTGCTTTTGACCTTATTTTTCTGTGCGGT<br>ATTTACACCCG    |
| FO10461 | replace <i>kanMX-</i><br><i>GAL1</i> with <i>URA3</i> | ATTCACAACCTTTGGTCAAACGCCTTTACAAATATTTTCAGGAGATTGTA<br>CTGAGAGTGCAC |



|         |                                                                |                                                                  |
|---------|----------------------------------------------------------------|------------------------------------------------------------------|
| FO10462 | replace <i>kanMX-</i><br><i>GAL1</i> with <i>URA3</i>          | AAGATTGTCTTCTCAAATATTGGCTTCATTGGAACCTTACCTGTGCG<br>GTATTTACACCCG |
| FO6828  | replace <i>URA3</i> with<br>endogenous<br><i>BPH1</i> sequence | TTACCCAGGCGCTGTAAATC                                             |
| FO6829  | replace <i>URA3</i> with<br>endogenous<br><i>BPH1</i> sequence | GGTTACCTGAAACCGAATGC                                             |
| FO2143  | integrate <i>kanMX-</i><br><i>GAL1</i> at 280 bp               | TCTGGGACATGATTAATTTTGAAGTGAATTCGAGCTCGTTTAAAC                    |
| FO2054  | integrate <i>kanMX-</i><br><i>GAL1</i> at 280 bp               | AAATATCGTAAAGATAAGCATTTCGGGAATTCGAGCTCGTTTAAAC                   |
| FO3085  | integrate <i>kanMX-</i><br><i>GAL1</i> at 1397 bp              | TATGAAGCTTTGGCTTCCCTGGAAAATGCTGAATTCGAGCTCGTTTA<br>AAC           |
| FO3086  | integrate <i>kanMX-</i><br><i>GAL1</i> at 1397 bp              | AGATATGAAGATACTATCATAGCTGAGGAATCATCGCTTCGCTGATT<br>AATTACCC      |
| FO6666  | integrate <i>kanMX-</i><br><i>GAL1</i> at 2027 bp              | CGCAAGAATCACGGGGATATGACGGTTAGCTGAATTCGAGCTCGTT<br>TAAAC          |
| FO6667  | integrate <i>kanMX-</i><br><i>GAL1</i> at 2027 bp              | AGTTTCCAAACAAAGACTTCGTGCTTTAGG<br>TCATCGCTTCGCTGATTAATTACCC      |
| FO10659 | Flag-tag MED3                                                  | GAACAATCTGGAATTAGGTGGTCTGAACATGGATTTCTTGCGGATCC<br>CCGGGTAAATTA  |
| FO10660 | Flag-tag MED3                                                  | TATACAGATAATTACTATCTTGGATACATAGATGCACCAGGAATTCGA<br>GCTCGTTTAAAC |

|         |                             |                                                  |
|---------|-----------------------------|--------------------------------------------------|
| FO10241 | delete                      | TATACATATCCATATCTAATCTTACTTATATGTTGTGGAAGGGAACAA |
|         | endogenous                  | AAGCTGG                                          |
|         | UAS <sub>GAL1-10</sub> with |                                                  |
|         | hphMX                       |                                                  |
| FO10242 | delete                      | GCAGCTTTTCCATTTATATATCTGTTAATAGATCAAAAATTATAGGGC |
|         | endogenous                  | GAATTGG                                          |
|         | UAS <sub>GAL1-10</sub> with |                                                  |
|         | hphMX                       |                                                  |
| FO10663 | ChIP qPCR                   | GGAAATCAGACGCCAATAGC                             |
|         | CCW12 UAS                   |                                                  |
| FO10664 | ChIP qPCR                   | GCCACCCTCACCTCACTAAC                             |
|         | CCW12 UAS                   |                                                  |
| F02947  | ChIP qPCR                   | AGGCACATCTGCGTTTCAG                              |
|         | reporter UAS                |                                                  |
| FO10665 | ChIP qPCR                   | ACGCTTAACTGCTCATTGCT                             |
|         | reporter UAS                |                                                  |
| FO10679 | ChIP qPCR                   | GCGAAGCGATGAGTAAGGTT                             |
|         | <i>BPH1</i> spacer 1        |                                                  |
| FO10680 | ChIP qPCR                   | GCGAAGCCCCTCCAGTATAA                             |
|         | <i>BPH1</i> spacer 1        |                                                  |
| FO2295  | ChIP qPCR                   | ATCGTAAAGATAAGCATTCCGGT                          |
|         | <i>BPH1</i> spacer 2        |                                                  |
| FO4216  | ChIP qPCR                   | TCGTGATAACAGCGCATCTC                             |
|         | <i>BPH1</i> spacer 2        |                                                  |

|         |                      |                         |
|---------|----------------------|-------------------------|
| FO4993  | ChIP qPCR            | GGGCTTTCTGCTCTGTCATC    |
|         | <i>HIS3</i> promoter |                         |
| FO5062  | ChIP qPCR            | CGCAAAAGGTCGCAATATCT    |
|         | <i>HIS3</i> promoter |                         |
| FO10671 | ChIP qPCR            | GCTAGGTGAGAGAAAGCAAAGG  |
|         | Chr V untranscribed  |                         |
|         | control              |                         |
| FO10672 | ChIP qPCR            | TACGATCTTAGTTCCAATGGTGA |
|         | Chr V untranscribed  |                         |
|         | control              |                         |

---

**Table S3. Crosses for bulk segregant analysis**

| Cross                     | Total tetrads | Segregants with<br>strong phenotype | Complete tetrads |
|---------------------------|---------------|-------------------------------------|------------------|
| FY3049 (1.2) x<br>FY3046  | 282           | 66 (6.8%)                           | 172 (61%)        |
| FY3052 (2.3a) x<br>FY3047 | 297           | 59 (6.4%)                           | 134 (45%)        |
| FY3053 (2.3b) x<br>FY3047 | 340           | 42 (4.1%)                           | 129 (38%)        |

**Table S4. Sequencing coverage of segregant pools**

| <b>Cross</b>              | <b>Segregants</b> | <b>Pool size<br/>(segregants)</b> | <b>Number of<br/>mapped reads</b> | <b>Fold coverage</b> |
|---------------------------|-------------------|-----------------------------------|-----------------------------------|----------------------|
| FY3049 (1.2) x<br>FY3046  | Wild type         | 45                                | 12,115,678                        | 89                   |
|                           | Mutant            | 45                                | 12,364,877                        | 85                   |
| FY3052 (2.3a) x<br>FY3047 | Wild type         | 48                                | 13,097,764                        | 101                  |
|                           | Mutant            | 48                                | 14,174,495                        | 97                   |
| FY3053 (2.3b) x<br>FY3047 | Wild type         | 42                                | 11,391,104                        | 80                   |
|                           | Mutant            | 42                                | 38,280,078                        | 260                  |

In each cross, wild-type segregants were those that were sensitive to 1 mM 3AT and mutant segregants were those resistant to 10 mM 3AT.

**Table S5. Causal mutant candidates**

| Mutant strain | Candidate      | Amino acid | Causative? | Mutant<br>reads/total read |
|---------------|----------------|------------|------------|----------------------------|
|               | gene           | change     |            |                            |
| FY3049 (1.2)  | <i>MOT3</i>    | N388H      | Yes        | 73/74                      |
|               | <i>GRR1</i>    | L181stop   | Yes        | 67/79                      |
|               | <i>SGM1</i>    | L407S      | No         | 79/95                      |
|               | <i>SGF73</i>   | P84L       | No         | 46/69                      |
|               | <i>TMA108</i>  | A458V      | No         | 42/67                      |
|               | <i>RIM8</i>    | P52L       | No         | 46/68                      |
| FY3052 (2.3a) | <i>PTR3</i>    | S363stop   | Yes        | 68/68                      |
|               | <i>YOR019W</i> | N553K      | Weakly     | 48/97                      |
|               | <i>MIT1</i>    | H187R      | Yes        | 81/81                      |
| FY3053 (2.3b) | <i>PTR3</i>    | N553K      | Yes        | 231/235                    |
|               | <i>YOR019W</i> | N553K      | Weakly     | 62/259                     |
|               | <i>MSN2</i>    | C652stop   | Yes        | 252/252                    |

Causality was determined by allele replacement for most of the listed mutations as described in Materials and Methods. For three mutations, in *SGF73*, *TMA108*, and *RIM8*, allele replacement was not done. Instead, these mutations were tested during reconstruction of the polygenic mutant and were shown to not confer any mutant phenotype.

**Table S6. Number of genes with a two-fold or greater change in RNA levels in the polygenic mutants**

|               |                | Strain               |               |      |      |
|---------------|----------------|----------------------|---------------|------|------|
| Carbon source | Genes affected | <i>sin4Δ0 mot3-1</i> |               |      |      |
|               |                | 1.2                  | <i>grr1-1</i> | 2.3a | 2.3b |
| Glucose       | Up             | 416                  | 182           | 145  | 167  |
|               | Down           | 158                  | 79            | 62   | 82   |
| Galactose     | Up             | 474                  | 133           | 146  | 184  |
|               | Down           | 426                  | 139           | 78   | 133  |
| Raffinose     | Up             | 313                  | 152           | 180  | 172  |
|               | Down           | 135                  | 84            | 123  | 141  |

Shown for each strain is the number of genes whose RNA levels change by two-fold or more when the strains are grown in YP medium with the indicated carbon sources. The actual strains used are as follows: 1.2, FY3056; *sin4Δ0 mot3-1 grr1-1*, FY3061; 2.3a, FY3057; 2.3b, FY3058.

**Table S7. Adjacent gene pairs enrichment**

|           |                                       | Promoter Orientation |    |          |           |    |          |        |    |          |
|-----------|---------------------------------------|----------------------|----|----------|-----------|----|----------|--------|----|----------|
|           |                                       | Convergent           |    |          | Divergent |    |          | Tandem |    |          |
|           |                                       | E                    | O  | p-value  | E         | O  | p-value  | E      | O  | p-value  |
| Raffinose | 1.2                                   | 2.75                 | 8  | 2.10E-03 | 1.87      | 15 | 1.90E-10 | 6.07   | 22 | 1.20E-07 |
|           | <i>sin4Δ0</i><br><i>mot3-1 grr1-1</i> | 0.613                | 4  | 4.30E-04 | 0.344     | 4  | 3.00E-05 | 0.943  | 5  | 4.40E-04 |
|           | 2.3a                                  | 1.08                 | 2  | 9.50E-02 | 0.636     | 5  | 5.40E-05 | 1.85   | 11 | 6.30E-07 |
|           | 2.3b                                  | 0.873                | 4  | 2.10E-03 | 0.514     | 8  | 4.30E-09 | 1.91   | 9  | 3.20E-05 |
| Glucose   | 1.2                                   | 5.77                 | 19 | 3.00E-06 | 3.63      | 18 | 1.10E-08 | 4.87   | 23 | 4.80E-10 |
|           | <i>sin4Δ0</i><br><i>mot3-1 grr1-1</i> | 0.760                | 5  | 1.40E-04 | 0.488     | 3  | 1.60E-03 | 0.340  | 4  | 2.90E-05 |
|           | 2.3a                                  | 0.726                | 5  | 1.10E-04 | 0.323     | 3  | 3.50E-04 | 0.468  | 8  | 2.00E-09 |
|           | 2.3b                                  | 1.02                 | 7  | 1.20E-05 | 0.424     | 5  | 5.70E-06 | 0.726  | 8  | 8.00E-08 |
| Galactose | 1.2                                   | 6.07                 | 22 | 1.20E-07 | 11.89     | 24 | 6.00E-04 | 14.99  | 35 | 2.90E-06 |
|           | <i>sin4Δ0</i><br><i>mot3-1 grr1-1</i> | 0.943                | 5  | 4.40E-04 | 2.238     | 9  | 1.20E-04 | 0.754  | 4  | 1.10E-03 |
|           | 2.3a                                  | 1.85                 | 11 | 6.30E-07 | 1.40      | 8  | 1.60E-05 | 1.40   | 11 | 3.20E-08 |
|           | 2.3b                                  | 1.91                 | 9  | 3.20E-05 | 1.77      | 10 | 2.70E-06 | 2.08   | 16 | 1.00E-10 |

Shown for each strains are the expected number (E) of adjacent gene pairs upregulated given the overall number of upregulated genes, the observed (O) number of upregulated gene pairs, and the p-value for the significance in difference between observed and expected. Analysis was performed for convergent, divergent, and tandem promoter orientation when the strains are grown in YP medium with the indicated carbon sources. The actual strains used are as follows: 1.2, FY3056; *sin4Δ0 mot3-1 grr1-1*, FY3061; 2.3a, FY3057; 2.3b, FY3058.



## Supplemental Figure 1

A

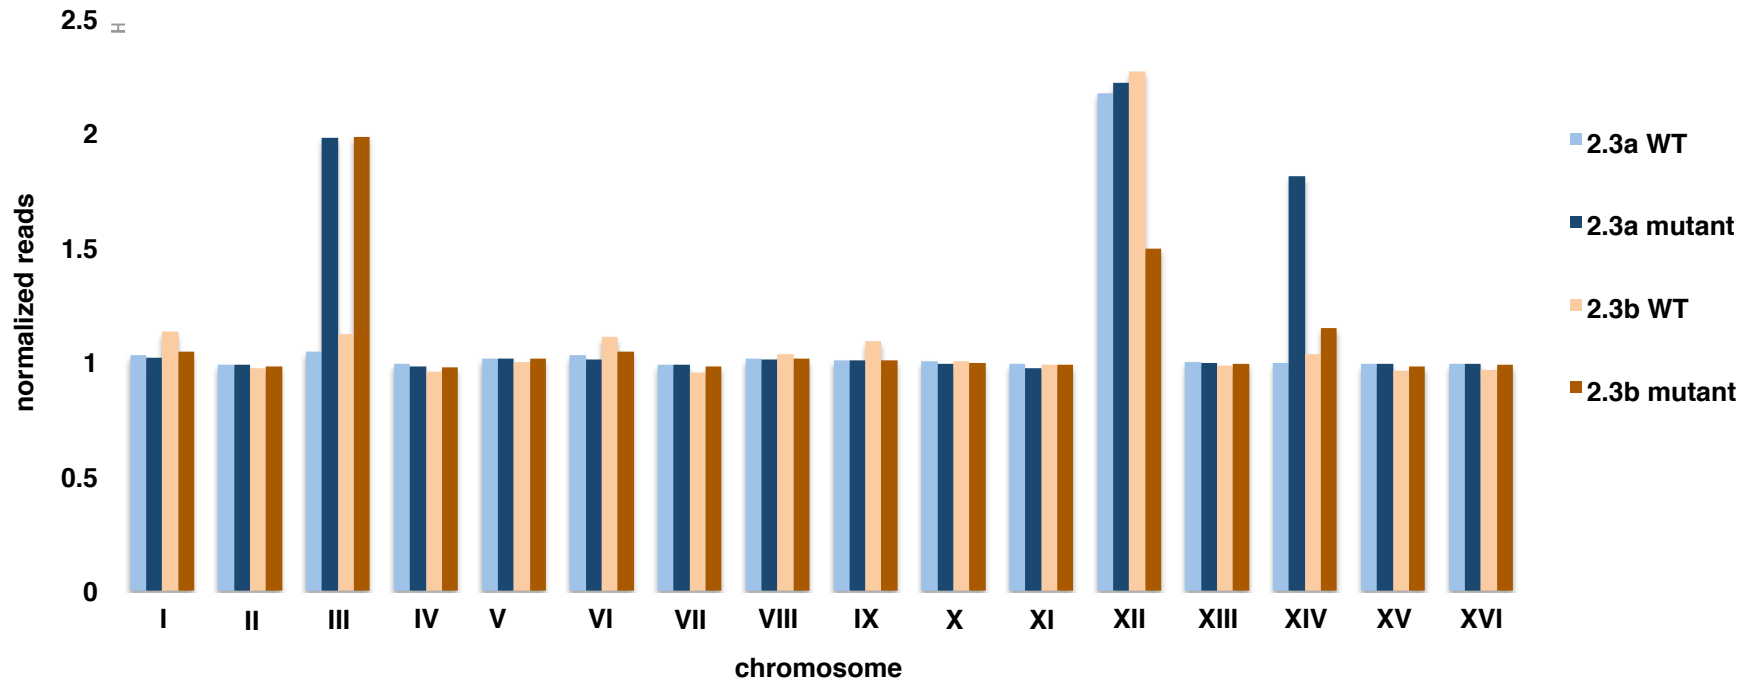

**Figure S1.** Evidence for disomy in two of the polygenic mutants. (A) Shown are the normalized levels of sequencing reads across each *S. cerevisiae* chromosome. The elevated reads for chromosomes III and XIV are likely caused by disomy for those chromosomes. The elevated reads for chromosome XII are likely an artifact of the repeated rDNA.

## Supplemental Figure 2

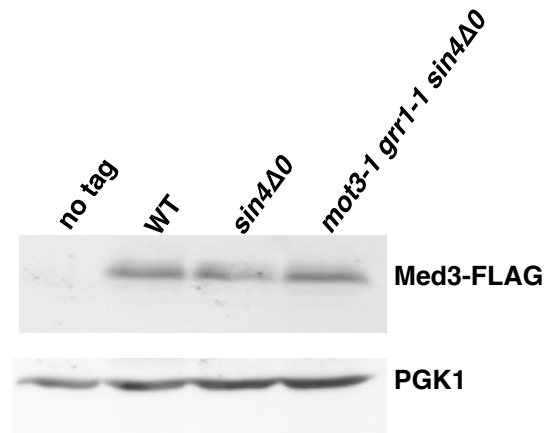

**Figure S2.** Western analysis of Med3. Shown is a representative western looking at levels of Med3-FLAG. Quantitation of three experiments is shown in Figure 9C.
