# Supplementary material
Source: PubMed Central journal article supplement (PMC4596672)
Supplement: 10.1534_115.181164_genetics.115.181164-2.pdf [file 10.1534_115.181164_genetics.115.181164-2.pdf]

**Table S3. Crosses for bulk segregant analysis**

| Cross                     | Total tetrads | Segregants with<br>strong phenotype | Complete tetrads |
|---------------------------|---------------|-------------------------------------|------------------|
| FY3049 (1.2) x<br>FY3046  | 282           | 66 (6.8%)                           | 172 (61%)        |
| FY3052 (2.3a) x<br>FY3047 | 297           | 59 (6.4%)                           | 134 (45%)        |
| FY3053 (2.3b) x<br>FY3047 | 340           | 42 (4.1%)                           | 129 (38%)        |
