# Supplementary material
Source: PubMed Central journal article supplement (PMC4596672)
Supplement: 10.1534_115.181164_genetics.115.181164-3.pdf [file 10.1534_115.181164_genetics.115.181164-3.pdf]

## Supplemental Figure 2

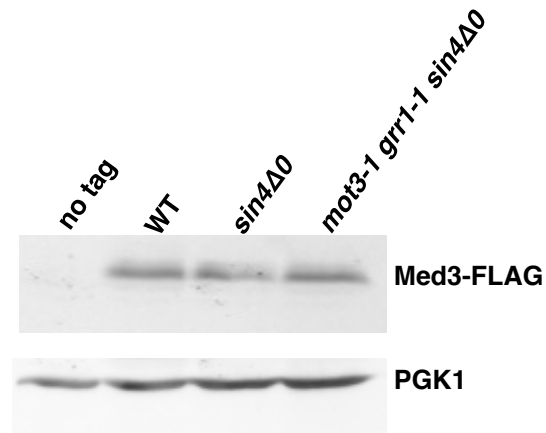

**Figure S2.** Western analysis of Med3. Shown is a representative western looking at levels of Med3-FLAG. Quantitation of three experiments is shown in Figure 9C.
