# Supplementary material
Source: PubMed Central journal article supplement (PMC4596672)
Supplement: 10.1534_115.181164_genetics.115.181164-4.pdf [file 10.1534_115.181164_genetics.115.181164-4.pdf]

## Supplemental Figure 1

A

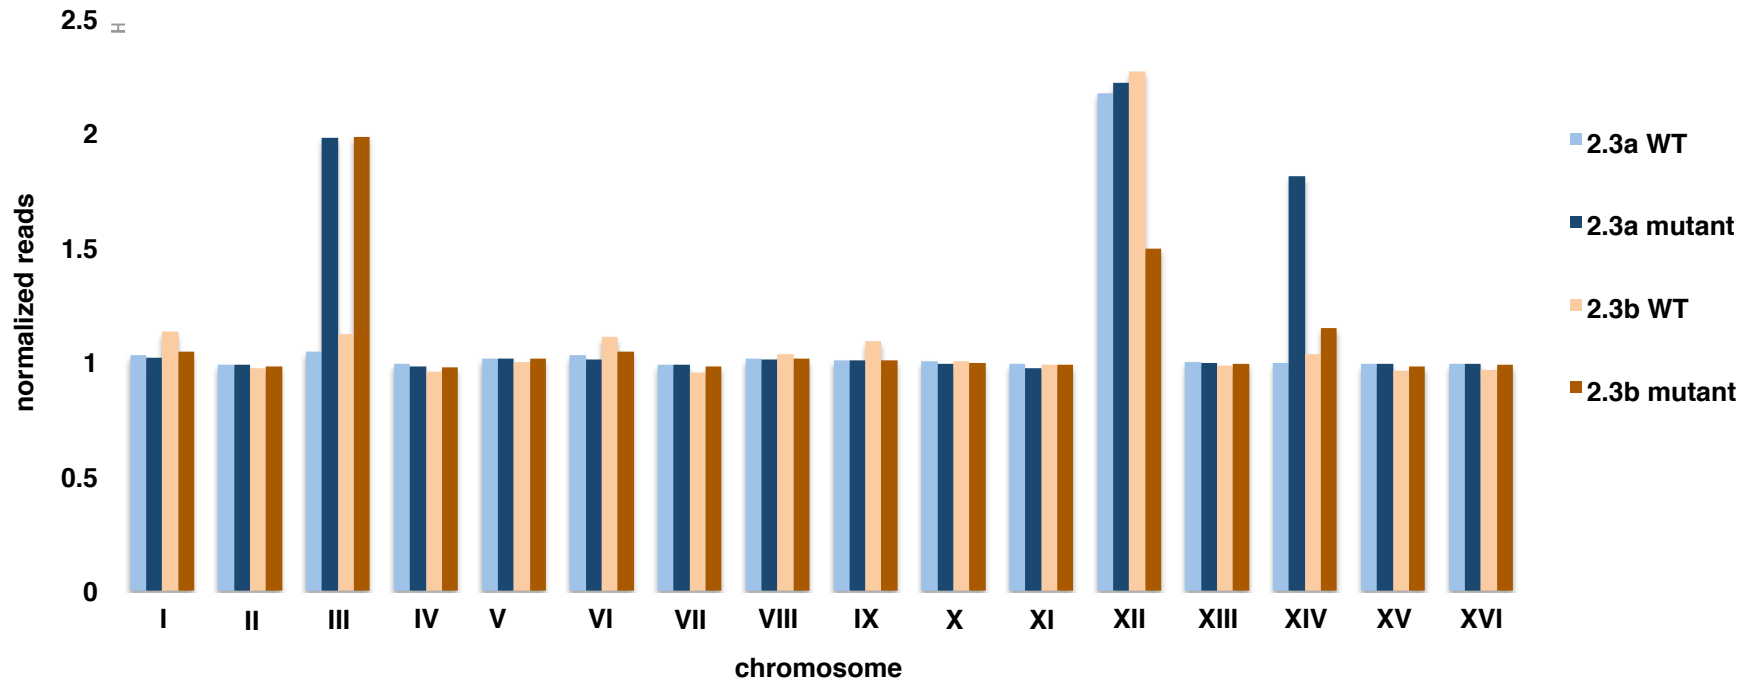

**Figure S1.** Evidence for disomy in two of the polygenic mutants. (A) Shown are the normalized levels of sequencing reads across each *S. cerevisiae* chromosome. The elevated reads for chromosomes III and XIV are likely caused by disomy for those chromosomes. The elevated reads for chromosome XII are likely an artifact of the repeated rDNA.
