# Supplementary material
Source: PubMed Central journal article supplement (PMC4596672)
Supplement: 10.1534_115.181164_genetics.115.181164-5.pdf [file 10.1534_115.181164_genetics.115.181164-5.pdf]

**Table S6. Number of genes with a two-fold or greater change in RNA levels in the polygenic mutants**

|               |                | Strain               |               |      |      |
|---------------|----------------|----------------------|---------------|------|------|
| Carbon source | Genes affected | <i>sin4Δ0 mot3-1</i> |               |      |      |
|               |                | 1.2                  | <i>grr1-1</i> | 2.3a | 2.3b |
| Glucose       | Up             | 416                  | 182           | 145  | 167  |
|               | Down           | 158                  | 79            | 62   | 82   |
| Galactose     | Up             | 474                  | 133           | 146  | 184  |
|               | Down           | 426                  | 139           | 78   | 133  |
| Raffinose     | Up             | 313                  | 152           | 180  | 172  |
|               | Down           | 135                  | 84            | 123  | 141  |

Shown for each strain is the number of genes whose RNA levels change by two-fold or more when the strains are grown in YP medium with the indicated carbon sources. The actual strains used are as follows: 1.2, FY3056; *sin4Δ0 mot3-1 grr1-1*, FY3061; 2.3a, FY3057; 2.3b, FY3058.
