# Supplementary material
Source: PubMed Central journal article supplement (PMC4596672)
Supplement: 10.1534_115.181164_genetics.115.181164-6.pdf [file 10.1534_115.181164_genetics.115.181164-6.pdf]

**Table S2. Oligonucleotides**

| Oligo  | Purpose                                                              | Sequence                                                         |
|--------|----------------------------------------------------------------------|------------------------------------------------------------------|
| FO8064 | replace <i>HIS3</i> ORF with <i>URA3</i> ORF in <i>dug2</i> reporter | TATACTAAAAAATGAGCAGGCAAGATAAACGAAGGCAAAGATGTCGA<br>AAGCTACATATAA |
| FO8065 | replace <i>HIS3</i> ORF with <i>URA3</i> ORF at <i>dug2</i> reporter | TATATATATCGTATGCTGCAGCTTTAATAATCGGTGTCATTAGTTTT<br>GCTGGCCGCATC  |
| FO6834 | Northern probe of <i>HIS3</i>                                        | GATCTTTCGAACAGGCCGTA                                             |
| FO4995 | Northern probe of <i>HIS3</i>                                        | ACCTTTGGTGGAGGGAACAT                                             |
| FO481  | Northern probe of <i>URA3</i>                                        | CCATGGAGGGCACAGTTAAGCCGC                                         |
| F0483  | Northern probe of <i>URA3</i>                                        | CCCTTCCCTTTGCAAATAGTCCTC                                         |
| FO1324 | Northern probe of <i>SNR190</i>                                      | GGCCCTGATGATAATG                                                 |
| FO1325 | Northern probe of <i>SNR190</i>                                      | GGCTCAGATCTGCATG                                                 |
| FO3662 | delete <i>URA3</i> from <i>dug2</i> reporter                         | GTTGGTTGGGTGACCCAACAAATCAT                                       |
| FO3663 | delete <i>URA3</i> from                                              | CTATTGAATACTTTAGACAAAATCTCA                                      |

*dug2* reporter

FO10433 integrate *URA3* at TCGCAACAAAGACATTTTCTATGCCCTTGGTGCTTAAGCAAGATTGT  
site of *mot3* ACTGAGAGTGCAC  
mutation

FO10434 integrate *URA3* at AATTGTTGTAGTTAAAGATGATGTTGTTTTTCTTGAGTTCCTGTGCGG  
site of *mot3* TATTTACACCG  
mutation

FO10277 replace *URA3* with ACGACAGCACCTAACCATCC  
*mot3* allele

FO10278 replace *URA3* with TCTTCATTTTCGGGAGCTGT  
*mot3* allele

FO10271 integrate *URA3* at AAAAAAATCCAAGAGTTTCTGGTTGTTATAGAGAAACGTAAGATTGTA  
site of *grr1* CTGAGAGTGAC  
mutation

FO10272 integrate *URA3* at TTTAAGGTTGTCTAGCTCAATTCGTTTCAGTATTTTTTTTTCTGTGCGG  
site of *grr1* TATTTACACCG  
mutation

FO10273 replace *URA3* with CGCTGAACGGGATTGACATA  
WT *GRR1* allele

FO10274 replace *URA3* with GCTTGGAATGGCAGTATGCA  
WT *GRR1* allele

FO10435 integrate *URA3* at AAAGAAAAAATGATATTGAAGAAAAATATCAAACCTGCCTAGATTGTA  
site of *sgm1* CTGAGAGTGAC  
mutation

FO10436 integrate *URA3* at GTCTCTCCAAGTCTTTCACTTCCAAAAGTGCCTTCGAATGCTGTGCG  
site of *sgm1* GTATTTACACCG  
mutation

FO10281 replace *URA3* with TCAAAGGCCAACTGGGATAG  
*sgm1* allele

FO10282 replace *URA3* with TCGCCAAGTTTTGACATTGA  
*sgm1* allele

FO10263 integrate *URA3* at AAGCTGAAGAGACCTCCATTCAACTCGATTGAAAATTTACAGATTGTA  
site of *mit1* CTGAGAGTGAC  
mutation

FO10264 integrate at site of ATTTTGTTTTATATCTTTTACAGAATAATAAGAGACAATACTGTGCGG  
*mit1* mutation TATTTACACCG

FO10265 replace *URA3* with GTA CTGATTCCGCCGTCATT  
*mit1* allele

FO10266 replace *URA3* with TCAGGGGAGTGGAAGAGTTG  
*mit1* allele

FO10431 integrate *URA3* at AACTTCAACCAACTAACAGAGCAATCGTCATCTTCACTCTAGATTGTA  
site of *ptr3* CTGAGAGTGAC  
mutation

FO10432 integrate *URA3* at TATCAAGAAATCATTGGAAAGTTTGCAAAAACGTTGGCTCCTGTGCG  
site of *ptr3* GTATTTACACCG  
mutation

FO10269 replace *URA3* with GCACATGATCTGGACGAAGA  
*ptr3* allele

FO10270 replace *URA3* with ATGGGGAATCTCGACACGTA  
*ptr3* allele

FO10397 integrate *URA3* at CCAGCTTTAAGAATGCTTTGATAGGCAATGGGTGCGAAAAAAGATTGT  
site of *yor019w* ACTGAGAGTGCCAC  
mutation

FO10398 integrate *URA3* at CTGAGGAAGAATATGGTATTAAAGATTTTCTAAACTTTGTCTGTGCGG  
site of *yor019w* TATTTACACCCG  
mutation

FO10363 replace *URA3* with CCCAGCATTCAAGAAGGAAG  
*yor019w* allele

FO10364 replace *URA3* with GCACCGGCACTTTTAACTTT  
*yor019w* allele

FO10453 integrate *URA3* at AAGTGTCGTAATAGAATCAACAAAGGAACTCGAGGAGAAAAGATTGT  
site of *msn2* ACTGAGAGTGCCAC  
mutation

FO10454 integrate *URA3* at GGTCGTTTCGTTAGAGTGAACAGATCTCACATGCCTTTTCACTGTGCG  
site of *msn2* GTATTTACACCCG  
mutation

FO10451 replace *URA3* with TATCACCATTTCCCACAGCA  
*msn2* allele

FO10452 replace *URA3* with TGACAAGCAAATGGTCGTTC  
*msn2* allele

FO10323 delete *MOT3* with TAGGCAAATAGTAAAGGGACATATCATATTTGAGCAATGAAGATTGT  
*URA3* ACTGAGAGTGCCAC

|         |                                                       |                                                                    |
|---------|-------------------------------------------------------|--------------------------------------------------------------------|
| FO10324 | delete <i>MOT3</i> with<br><i>URA3</i>                | ATGAGTGGGAAGGGATATTTTGTGTGTCTATAAAGTCTATCTGTGCG<br>GTATTTACACCCG   |
| FO10317 | delete <i>GRR1</i> with<br><i>URA3</i>                | AAACAGTTTTGCGTTTTCTTTATACTAAGAAGGTCTATAAGATTGTA<br>CTGAGAGTGCAC    |
| FO10318 | delete <i>GRR1</i> with<br><i>URA3</i>                | AAAGGTGTAGTAGGACAGTAAGTATTCAATGAAATACAACGTGCGG<br>TATTTACACCCG     |
| FO10519 | delete <i>MIT1</i> with<br><i>URA3</i>                | CAACATTTCAACTAGACACAAGGACAACGTAAATTTCTAAAGATTGTA<br>CTGAGAGTGCAC   |
| FO10520 | delete <i>MIT1</i> with<br><i>URA3</i>                | AAGAAAAGAAAATCGGAGTACTTTTTTAAAATATATTTACCTGTGCGG<br>TATTTACACCCG   |
| FO10521 | delete <i>PTR3</i> with<br><i>URA3</i>                | ACACATACATAGGTACGAAATACACAACGTAGAGCGTTCAGATTGT<br>ACTGAGAGTGCAC    |
| FO10522 | delete <i>PTR3</i> with<br><i>URA3</i>                | GTATACCAGAACCTTAAACATACGTATATATTTAGATGCACTGTGCG<br>GTATTTACACCCG   |
| FO7014  | delete <i>MSN2</i> with<br><i>URA3</i>                | TTTTTCAACTTTTATTGCTCATAGAAGAACTAGATCTAAAAGATTGTAC<br>TGAGAGTGCAC   |
| FO7015  | delete <i>MSN2</i> with<br><i>URA3</i>                | TTATGAAGAAAGATCTATCGAATTAATAAATGGGGTCTACTGTGCG<br>GTATTTACACCCG    |
| FO7018  | delete <i>MSN4</i> with<br><i>URA3</i>                | TTCGGCTTTTTTTCTTTTCTTCTTATTAATAAACAATATAAGATTGTAC<br>TGAGAGTGCAC   |
| FO7019  | delete <i>MSN4</i> with<br><i>URA3</i>                | TAGCTTGTCTTGCTTTTATTTGCTTTTGACCTTATTTTTCTGTGCGGT<br>ATTTACACCCG    |
| FO10461 | replace <i>kanMX-</i><br><i>GAL1</i> with <i>URA3</i> | ATTCACAACCTTTGGTCAAACGCCTTTACAAATATTTTCAGGAGATTGTA<br>CTGAGAGTGCAC |

|         |                                                                |                                                                  |
|---------|----------------------------------------------------------------|------------------------------------------------------------------|
| FO10462 | replace <i>kanMX-</i><br><i>GAL1</i> with <i>URA3</i>          | AAGATTGTCTTCTCAAATATTGGCTTCATTGGAACCTTACCTGTGCG<br>GTATTTACACCCG |
| FO6828  | replace <i>URA3</i> with<br>endogenous<br><i>BPH1</i> sequence | TTACCCAGGCGCTGTAAATC                                             |
| FO6829  | replace <i>URA3</i> with<br>endogenous<br><i>BPH1</i> sequence | GGTTACCTGAAACCGAATGC                                             |
| FO2143  | integrate <i>kanMX-</i><br><i>GAL1</i> at 280 bp               | TCTGGGACATGATTAATTTCGAACTGAATTCGAGCTCGTTTAAAC                    |
| FO2054  | integrate <i>kanMX-</i><br><i>GAL1</i> at 280 bp               | AAATATCGTAAAGATAAGCATTCCGGGAATTCGAGCTCGTTTAAAC                   |
| FO3085  | integrate <i>kanMX-</i><br><i>GAL1</i> at 1397 bp              | TATGAAGCTTTGGCTTCCCTGGAAAATGCTGAATTCGAGCTCGTTTA<br>AAC           |
| FO3086  | integrate <i>kanMX-</i><br><i>GAL1</i> at 1397 bp              | AGATATGAAGATACTATCATAGCTGAGGAATCATCGCTTCGCTGATT<br>AATTACCC      |
| FO6666  | integrate <i>kanMX-</i><br><i>GAL1</i> at 2027 bp              | CGCAAGAATCACGGGGATATGACGGTTAGCTGAATTCGAGCTCGTT<br>TAAAC          |
| FO6667  | integrate <i>kanMX-</i><br><i>GAL1</i> at 2027 bp              | AGTTTCCAAACAAAGACTTCGTGCTTTAGG<br>TCATCGCTTCGCTGATTAATTACCC      |
| FO10659 | Flag-tag MED3                                                  | GAACAATCTGGAATTAGGTGGTCTGAACATGGATTTCTTGCGGATCC<br>CCGGGTTAATTAA |
| FO10660 | Flag-tag MED3                                                  | TATACAGATAATTACTATCTTGGATACATAGATGCACCAGGAATTCGA<br>GCTCGTTTAAAC |

|         |                             |                                                  |
|---------|-----------------------------|--------------------------------------------------|
| FO10241 | delete                      | TATACATATCCATATCTAATCTTACTTATATGTTGTGGAAGGGAACAA |
|         | endogenous                  | AAGCTGG                                          |
|         | UAS <sub>GAL1-10</sub> with |                                                  |
|         | hphMX                       |                                                  |
| FO10242 | delete                      | GCAGCTTTTCCATTTATATATCTGTTAATAGATCAAAAATTATAGGGC |
|         | endogenous                  | GAATTGG                                          |
|         | UAS <sub>GAL1-10</sub> with |                                                  |
|         | hphMX                       |                                                  |
| FO10663 | ChIP qPCR                   | GGAAATCAGACGCCAATAGC                             |
|         | CCW12 UAS                   |                                                  |
| FO10664 | ChIP qPCR                   | GCCACCCTCACCTCACTAAC                             |
|         | CCW12 UAS                   |                                                  |
| F02947  | ChIP qPCR                   | AGGCACATCTGCGTTTCAG                              |
|         | reporter UAS                |                                                  |
| FO10665 | ChIP qPCR                   | ACGCTTAACTGCTCATTGCT                             |
|         | reporter UAS                |                                                  |
| FO10679 | ChIP qPCR                   | GCGAAGCGATGAGTAAGGTT                             |
|         | <i>BPH1</i> spacer 1        |                                                  |
| FO10680 | ChIP qPCR                   | GCGAAGCCCCTCCAGTATAA                             |
|         | <i>BPH1</i> spacer 1        |                                                  |
| FO2295  | ChIP qPCR                   | ATCGTAAAGATAAGCATTTCGGT                          |
|         | <i>BPH1</i> spacer 2        |                                                  |
| FO4216  | ChIP qPCR                   | TCGTGATAACAGCGCATCTC                             |
|         | <i>BPH1</i> spacer 2        |                                                  |

|         |                      |                         |
|---------|----------------------|-------------------------|
| FO4993  | ChIP qPCR            | GGGCTTTCTGCTCTGTCATC    |
|         | <i>HIS3</i> promoter |                         |
| FO5062  | ChIP qPCR            | CGCAAAAGGTCGCAATATCT    |
|         | <i>HIS3</i> promoter |                         |
| FO10671 | ChIP qPCR            | GCTAGGTGAGAGAAAGCAAAGG  |
|         | Chr V untranscribed  |                         |
|         | control              |                         |
| FO10672 | ChIP qPCR            | TACGATCTTAGTTCCAATGGTGA |
|         | Chr V untranscribed  |                         |
|         | control              |                         |

---
