# Supplementary material
Source: PubMed Central journal article supplement (PMC4596672)
Supplement: 10.1534_115.181164_genetics.115.181164-7.pdf [file 10.1534_115.181164_genetics.115.181164-7.pdf]

**Table S1. *S. cerevisiae* strains**

| Strain        | Genotype                                                                                                                                                                                             |
|---------------|------------------------------------------------------------------------------------------------------------------------------------------------------------------------------------------------------|
| FY76          | <i>MATa lys2-128δ</i>                                                                                                                                                                                |
| FY3045        | <i>MATa his3Δ200 ura3Δ0 leu2Δ0 trp1Δ63 lys2-128δ bph1Δ::kanMX-UAS<sub>GAL1</sub> 799-HIS3 dug2Δ::TRP1-UAS<sub>GAL1</sub>806-URA3-natMX</i>                                                           |
| FY3046 (2.0)  | <i>MATa his3Δ200 ura3Δ0 leu2Δ0 trp1Δ63 lys2-128δ sin4Δ0::LEU2 bph1Δ::kanMX-UAS<sub>GAL1</sub> 799-HIS3 dug2Δ::TRP1-UAS<sub>GAL1</sub>806-URA3-natMX</i>                                              |
| FY3047 (1.0)  | <i>MATα his3Δ200 ura3Δ0 leu2Δ0 trp1Δ63 lys2-128δ sin4Δ0::LEU2 bph1Δ::kanMX-UAS<sub>GAL1</sub> 799-HIS3 dug2Δ::TRP1-UAS<sub>GAL1</sub>806-URA3-natMX</i>                                              |
| FY3048 (1.1)  | <i>MATα his3Δ200 ura3Δ0 leu2Δ0 trp1Δ63 lys2-128δ sin4Δ0::LEU2 bph1Δ::kanMX-UAS<sub>GAL1</sub> 799-HIS3 dug2Δ::TRP1-UAS<sub>GAL1</sub>806-URA3-natMX grr1-1</i>                                       |
| FY3049 (1.2)  | <i>MATα his3Δ200 ura3Δ0 leu2Δ0 trp1Δ63 lys2-128δ sin4Δ0::LEU2 bph1Δ::kanMX-UAS<sub>GAL1</sub> 799-HIS3 dug2Δ::TRP1-UAS<sub>GAL1</sub>806-URA3-natMX mot3-1 grr1-1 sgm1-1 rim8-1 tma108-1 sgf73-1</i> |
| FY3050 (2.1)  | <i>MATa his3Δ200 ura3Δ0 leu2Δ0 trp1Δ63 lys2-128δ sin4Δ0::LEU2 bph1Δ::kanMX-UAS<sub>GAL1</sub> 799-HIS3 dug2Δ::TRP1-UAS<sub>GAL1</sub>806-URA3-natMX yor019w-1</i>                                    |
| FY3051 (2.2)  | <i>MATa his3Δ200 ura3Δ0 leu2Δ0 trp1Δ63 lys2-128δ sin4Δ0::LEU2 bph1Δ::kanMX-UAS<sub>GAL1</sub> 799-HIS3 dug2Δ::TRP1-UAS<sub>GAL1</sub>806-URA3-natMX ptr3-1 yor019w-1</i>                             |
| FY3052 (2.3a) | <i>MATa his3Δ200 ura3Δ0 leu2Δ0 trp1Δ63 lys2-128δ sin4Δ0::LEU2 bph1Δ::kanMX-UAS<sub>GAL1</sub> 799-HIS3 dug2Δ::TRP1-UAS<sub>GAL1</sub>806-URA3-natMX mit1-1 ptr3-1 yor019w-1</i>                      |
| FY3053 (2.3b) | <i>MATa his3Δ200 ura3Δ0 leu2Δ0 trp1Δ63 lys2-128δ sin4Δ0::LEU2 bph1Δ::kanMX-UAS<sub>GAL1</sub> 799-HIS3 dug2Δ::TRP1-UAS<sub>GAL1</sub>806-URA3-natMX msn2-1 ptr3-1</i>                                |

*yor019w-1*

- FY3054 *MATa his3Δ200 ura3Δ0 leu2Δ0 lys2-128δ bph1Δ::kanMX-UAS<sub>GAL1</sub> 799-HIS3  
dug2Δ::TRP1-UAS<sub>GAL1</sub>806*
- FY3055 *MATa his3Δ200 ura3Δ0 leu2Δ0 trp1Δ63 lys2-128δ sin4Δ0::LEU2 bph1Δ::kanMX-  
UAS<sub>GAL1</sub> 799-HIS3 dug2Δ::TRP1-UAS<sub>GAL1</sub>806-URA3*
- FY3056 *MATα his3Δ200 ura3Δ0 leu2Δ0 trp1Δ63 lys2-128δ sin4Δ0::LEU2 bph1Δ::kanMX-  
UAS<sub>GAL1</sub> 799-HIS3 dug2Δ::TRP1-UAS<sub>GAL1</sub>806 mot3-1 grr1-1 sgm1-1 rim8-1 tma108-  
1 sgf73-1*
- FY3057 *MATa his3Δ200 ura3Δ0 leu2Δ0 trp1Δ63 lys2-128δ sin4Δ0::LEU2 bph1Δ::kanMX-  
UAS<sub>GAL1</sub> 799-HIS3 dug2Δ::TRP1-UAS<sub>GAL1</sub>806 mit1-1 ptr3-1 yor019w-1*
- FY3058 *MATa his3Δ200 ura3Δ0 leu2Δ0 trp1Δ63 lys2-128δ sin4Δ0::LEU2 bph1Δ::kanMX-  
UAS<sub>GAL1</sub> 799-HIS3 dug2Δ::TRP1-UAS<sub>GAL1</sub>806 msn2-1 ptr3-1 yor019w-1*
- FY3059 *MATa his3Δ200 ura3Δ0 leu2Δ0 trp1Δ63 lys2-128δ sin4Δ0::LEU2 bph1Δ::kanMX-  
UAS<sub>GAL1</sub> 799-HIS3 dug2Δ::TRP1-UAS<sub>GAL1</sub>806 mot3- 1*
- FY3060 *MATa his3Δ200 ura3Δ0 leu2Δ0 trp1Δ63 lys2-128δ sin4Δ0::LEU2 bph1Δ::kanMX-  
UAS<sub>GAL1</sub> 799-HIS3 dug2Δ::TRP1-UAS<sub>GAL1</sub>806 grr1-531*
- FY3061 *MATα his3Δ200 ura3Δ0 leu2Δ0 trp1Δ63 lys2-128δ sin4Δ0::LEU2 bph1Δ::kanMX-  
UAS<sub>GAL1</sub> 799-HIS3 dug2Δ::TRP1-UAS<sub>GAL1</sub>806 mot3-1 grr1-1*
- FY3062 *MATα his3Δ200 ura3Δ0 leu2Δ0 trp1Δ63 lys2-128δ bph1Δ::kanMX-UAS<sub>GAL1</sub> 799-  
HIS3 dug2Δ::TRP1-UAS<sub>GAL1</sub>806 mot3-1 grr1-1*
- FY3063 *MATα his3Δ200 ura3Δ0 leu2Δ0 trp1Δ63 lys2-128δ sin4Δ0::LEU2 bph1Δ::kanMX-  
UAS<sub>GAL1</sub> 799-HIS3 dug2Δ::TRP1-UAS<sub>GAL1</sub>806 mot3-1 msn2-1*
- FY3064 *MATa his3Δ200 ura3Δ0 leu2Δ0 trp1Δ63 lys2-128δ sin4Δ0::LEU2 bph1Δ::kanMX-  
UAS<sub>GAL1</sub> 799-HIS3 dug2Δ::TRP1-UAS<sub>GAL1</sub>806 msn2-1 sin4Δ0*

FY3065 *MAT $\alpha$  his3 $\Delta$ 200 ura3 $\Delta$ 0 leu2 $\Delta$ 0 trp1 $\Delta$ 63 lys2-128 $\delta$  sin4 $\Delta$ 0::LEU2 bph1 $\Delta$ ::kanMX-UASGAL1 799-HIS3 dug2 $\Delta$ ::TRP1-UASGAL1806 mit1-1 msn2-1*

FY3066 *MATa his3 $\Delta$ 200 ura3 $\Delta$ 0 leu2 $\Delta$ 0 trp1 $\Delta$ 63 lys2-128 $\delta$  sin4 $\Delta$ 0::LEU2 bph1 $\Delta$ ::kanMX-UASGAL1 799-HIS3 dug2 $\Delta$ ::TRP1-UASGAL1806 mit1-1 sin4 $\Delta$ 0*

FY3067 *MAT $\alpha$  his3 $\Delta$ 200 ura3 $\Delta$ 0 leu2 $\Delta$ 0 trp1 $\Delta$ 63 lys2-128 $\delta$  sin4 $\Delta$ 0::LEU2 bph1 $\Delta$ ::kanMX-UASGAL1 799-HIS3 dug2 $\Delta$ ::TRP1-UASGAL1806 mot3-1 mit1-1*

FY3068 *MAT $\alpha$  his3 $\Delta$ 200 ura3 $\Delta$ 0 leu2 $\Delta$ 0 trp1 $\Delta$ 63 lys2-128 $\delta$  sin4 $\Delta$ 0::LEU2 bph1 $\Delta$ ::kanMX-UASGAL1 799-HIS3 dug2 $\Delta$ ::TRP1-UASGAL1806 mot3-1 mit1-1 msn2-1*

FY3069 *MATa his3 $\Delta$ 200 ura3 $\Delta$ 0 leu2 $\Delta$ 0 trp1 $\Delta$ 63 lys2-128 $\delta$  sin4 $\Delta$ 0::LEU2 bph1 $\Delta$ ::kanMX-UAS<sub>GAL1</sub> 799-HIS3 dug2 $\Delta$ ::TRP1-UAS<sub>GAL1</sub>806 MIT1 ptr3-1 yor019w-1*

FY3070 *MATa his3 $\Delta$ 200 ura3 $\Delta$ 0 leu2 $\Delta$ 0 trp1 $\Delta$ 63 lys2-128 $\delta$  sin4 $\Delta$ 0::LEU2 bph1 $\Delta$ ::kanMX-UAS<sub>GAL1</sub> 799-HIS3 dug2 $\Delta$ ::TRP1-UAS<sub>GAL1</sub>806 mit1-1 PTR3 yor019w-1*

FY3071 *MATa his3 $\Delta$ 200 ura3 $\Delta$ 0 leu2 $\Delta$ 0 trp1 $\Delta$ 63 lys2-128 $\delta$  sin4 $\Delta$ 0::LEU2 bph1 $\Delta$ ::kanMX-UAS<sub>GAL1</sub> 799-HIS3 dug2 $\Delta$ ::TRP1-UAS<sub>GAL1</sub>806 mit1-1 ptr3-1 YOR019W*

FY3072 *MATa his3 $\Delta$ 200 ura3 $\Delta$ 0 leu2 $\Delta$ 0 trp1 $\Delta$ 63 lys2-128 $\delta$  sin4 $\Delta$ 0::LEU2 bph1 $\Delta$ ::kanMX-UAS<sub>GAL1</sub> 799-HIS3 dug2  $\Delta$ ::TRP1-UAS<sub>GAL1</sub>806 MSN2 ptr3-1 yor019w-1*

FY3073 *MATa his3 $\Delta$ 200 ura3 $\Delta$ 0 leu2 $\Delta$ 0 trp1 $\Delta$ 63 lys2-128 $\delta$  sin4 $\Delta$ 0::LEU2 bph1 $\Delta$ ::kanMX-UAS<sub>GAL1</sub> 799-HIS3 dug2  $\Delta$ ::TRP1-UAS<sub>GAL1</sub>806 msn2-1 PTR3 yor019w-1*

FY3074 *MATa his3 $\Delta$ 200 ura3 $\Delta$ 0 leu2 $\Delta$ 0 trp1 $\Delta$ 63 lys2-128 $\delta$  sin4 $\Delta$ 0::LEU2 bph1 $\Delta$ ::kanMX-UAS<sub>GAL1</sub> 799-HIS3 dug2  $\Delta$ ::TRP1-UAS<sub>GAL1</sub>806 msn2-1 ptr3-1 YOR019W*

FY3075 *MAT $\alpha$  his3 $\Delta$ 200 ura3 $\Delta$ 0 leu2 $\Delta$ 0 trp1 $\Delta$ 63 lys2-128 $\delta$  sin4 $\Delta$ 0::LEU2 bph1 $\Delta$ ::kanMX-UAS<sub>GAL1</sub> 799-HIS3 dug2 $\Delta$ ::TRP1-UAS<sub>GAL1</sub>806 mot3 $\Delta$ 0::URA3 grr1-1*

FY3076 *MAT $\alpha$  his3 $\Delta$ 200 ura3 $\Delta$ 0 leu2 $\Delta$ 0 trp1 $\Delta$ 63 lys2-128 $\delta$  sin4 $\Delta$ 0::LEU2 bph1 $\Delta$ ::kanMX-UAS<sub>GAL1</sub> 799-HIS3 dug2 $\Delta$ ::TRP1-UAS<sub>GAL1</sub>806 mot3-1 grr1 $\Delta$ 0::URA3*

FY3077 *MATa his3Δ200 ura3Δ0 leu2Δ0 trp1Δ63 lys2-128δ sin4Δ0::LEU2 bph1Δ::kanMX-UAS<sub>GAL1</sub> 799-HIS3 dug2Δ::TRP1-UAS<sub>GAL1</sub>806 mit1Δ0::URA3 ptr3-1 yor019w-1*

FY3078 *MATa his3Δ200 ura3Δ0 leu2Δ0 trp1Δ63 lys2-128δ sin4Δ0::LEU2 bph1Δ::kanMX-UAS<sub>GAL1</sub> 799-HIS3 dug2Δ::TRP1-UAS<sub>GAL1</sub>806 mit1-1 ptr3Δ0::URA3 yor019w-1*

FY3079 *MATa his3Δ200 ura3Δ0 leu2Δ0 trp1Δ63 lys2-128δ sin4Δ0::LEU2 bph1Δ::kanMX-UAS<sub>GAL1</sub> 799-HIS3 dug2Δ::TRP1-UAS<sub>GAL1</sub>806 msn2Δ0::URA3 ptr3-1 yor019w-1*

FY3080 *MATa his3Δ200 ura3Δ0 leu2Δ0 trp1Δ63 lys2-128δ sin4Δ0::LEU2 bph1Δ::kanMX-UAS<sub>GAL1</sub> 799-HIS3 dug2Δ::TRP1-UAS<sub>GAL1</sub>806 msn2-1 ptr3-Δ0::URA3 yor019w-1*

FY3081 *MATa his3Δ200 ura3Δ0 leu2Δ0 lys2-128δ bph1Δ::kanMX-UAS<sub>GAL1</sub>280-HIS3 dug2Δ::TRP1-UAS<sub>GAL1</sub>806*

FY3082 *MATa his3Δ200 ura3Δ0 leu2Δ0 lys2-128δ bph1Δ::kanMX-UAS<sub>GAL1</sub>1397-HIS3 dug2Δ::TRP1-UAS<sub>GAL1</sub>806*

FY3083 *MATa his3Δ200 ura3Δ0 leu2Δ0 lys2-128δ bph1Δ::kanMX-UAS<sub>GAL1</sub>2027-HIS3 dug2Δ::TRP1-UAS<sub>GAL1</sub>806*

FY3084 *MATa his3Δ200 ura3Δ0 leu2Δ0 trp1Δ63 lys2-128δ sin4Δ0::LEU2 bph1Δ::kanMX-UAS<sub>GAL1</sub>280-HIS3 dug2Δ::TRP1-UAS<sub>GAL1</sub>806-URA3*

FY3085 *MATa his3Δ200 ura3Δ0 leu2Δ0 trp1Δ63 lys2-128δ sin4Δ0::LEU2 bph1Δ::kanMX-UAS<sub>GAL1</sub>1397-HIS3 dug2Δ::TRP1-UAS<sub>GAL1</sub>806-URA3*

FY3086 *MATa his3Δ200 ura3Δ0 leu2Δ0 trp1Δ63 lys2-128δ sin4Δ0::LEU2 bph1Δ::kanMX-UAS<sub>GAL1</sub>2027-HIS3 dug2 Δ::TRP1-UAS<sub>GAL1</sub>806-URA3*

FY3087 *MATα his3Δ200 ura3Δ0 leu2Δ0 trp1Δ63 lys2-128δ sin4Δ0::LEU2 bph1Δ::kanMX-UAS<sub>GAL1</sub>280-HIS3 dug2Δ::TRP1-UAS<sub>GAL1</sub>806 mot3-1 grr1-1*

FY3088 *MATα his3Δ200 ura3Δ0 leu2Δ0 trp1Δ63 lys2-128δ sin4Δ0::LEU2 bph1Δ::kanMX-UAS<sub>GAL1</sub>1397-HIS3 dug2Δ::TRP1-UAS<sub>GAL1</sub>806 mot3-1 grr1-1*

FY3089 *MAT $\alpha$  his3 $\Delta$ 200 ura3 $\Delta$ 0 leu2 $\Delta$ 0 trp1 $\Delta$ 63 lys2-128 $\delta$  sin4 $\Delta$ 0::LEU2 bph1 $\Delta$ ::kanMX-UAS<sub>GAL1</sub>2027-HIS3 dug2 $\Delta$ ::TRP1-UAS<sub>GAL1</sub>806 mot3-1 grr1-1*

FY3090 *MAT $\alpha$  his3 $\Delta$ 200 ura3 $\Delta$ 0 leu2 $\Delta$ 0 trp1 $\Delta$ 63 lys2-128 $\delta$  sin4 $\Delta$ 0::LEU2 bph1 $\Delta$ ::kanMX-UAS<sub>GAL1</sub>280-HIS3 dug2 $\Delta$ ::TRP1-UAS<sub>GAL1</sub>806 mit1-1 ptr3-1 yor019w-1*

FY3091 *MAT $\alpha$  his3 $\Delta$ 200 ura3 $\Delta$ 0 leu2 $\Delta$ 0 trp1 $\Delta$ 63 lys2-128 $\delta$  sin4 $\Delta$ 0::LEU2 bph1 $\Delta$ ::kanMX-UAS<sub>GAL1</sub>1397-HIS3 dug2 $\Delta$ ::TRP1-UAS<sub>GAL1</sub>806 mit1-1 ptr3-1 yor019w-1*

FY3092 *MAT $\alpha$  his3 $\Delta$ 200 ura3 $\Delta$ 0 leu2 $\Delta$ 0 trp1 $\Delta$ 63 lys2-128 $\delta$  sin4 $\Delta$ 0::LEU2 bph1 $\Delta$ ::kanMX-UAS<sub>GAL1</sub>2027-HIS3 dug2 $\Delta$ ::TRP1-UAS<sub>GAL1</sub>806 mit1-1 ptr3-1 yor019w-1*

FY3093 *MAT $\alpha$  his3 $\Delta$ 200 ura3 $\Delta$ 0 leu2 $\Delta$ 0 trp1 $\Delta$ 63 lys2-128 $\delta$  sin4 $\Delta$ 0::LEU2 bph1 $\Delta$ ::kanMX-UAS<sub>GAL1</sub>280-HIS3 dug2 $\Delta$ ::TRP1-UAS<sub>GAL1</sub>806 msn2-1 ptr3-1 yor019w-1*

FY3094 *MAT $\alpha$  his3 $\Delta$ 200 ura3 $\Delta$ 0 leu2 $\Delta$ 0 trp1 $\Delta$ 63 lys2-128 $\delta$  sin4 $\Delta$ 0::LEU2 bph1 $\Delta$ ::kanMX-UAS<sub>GAL1</sub>1397-HIS3 dug2 $\Delta$ ::TRP1-UAS<sub>GAL1</sub>806 msn2-1 ptr3-1 yor019w-1*

FY3095 *MAT $\alpha$  his3 $\Delta$ 200 ura3 $\Delta$ 0 leu2 $\Delta$ 0 trp1 $\Delta$ 63 lys2-128 $\delta$  sin4 $\Delta$ 0::LEU2 bph1 $\Delta$ ::kanMX-UAS<sub>GAL1</sub>2027-HIS3 dug2 $\Delta$ ::TRP1-UAS<sub>GAL1</sub>806 msn2-1 ptr3-1 yor019w-1*

FY3096 *MAT $\alpha$  his3 $\Delta$ 200 ura3 $\Delta$ 0 leu2 $\Delta$ 0 lys2-128 $\delta$  bph1 $\Delta$ ::kanMX-UAS<sub>GAL1</sub> 799-HIS3 dug2 $\Delta$ ::TRP1-UAS<sub>GAL1</sub>806 UAS<sub>GAL1</sub>-10 $\Delta$ ::hphMX*

FY3097 *MAT $\alpha$  his3 $\Delta$ 200 ura3 $\Delta$ 0 leu2 $\Delta$ 0 lys2-128 $\delta$  bph1 $\Delta$ ::kanMX-UAS<sub>GAL1</sub> 799-HIS3 dug2 $\Delta$ ::TRP1-UAS<sub>GAL1</sub>806 UAS<sub>GAL1</sub>-10 $\Delta$ ::hphMX MED3-FLAG::natMX*

FY3098 *MAT $\alpha$  his3 $\Delta$ 200 ura3 $\Delta$ 0 leu2 $\Delta$ 0 lys2-128 $\delta$  bph1 $\Delta$ ::kanMX-UAS<sub>GAL1</sub> 799-HIS3 dug2 $\Delta$ ::TRP1-UAS<sub>GAL1</sub>806 UAS<sub>GAL1</sub>-10 $\Delta$ ::hphMX sin4 $\Delta$ 0::LEU2*

FY3099 *MAT $\alpha$  his3 $\Delta$ 200 ura3 $\Delta$ 0 leu2 $\Delta$ 0 lys2-128 $\delta$  bph1 $\Delta$ ::kanMX-UAS<sub>GAL1</sub> 799-HIS3 dug2 $\Delta$ ::TRP1-UAS<sub>GAL1</sub>806 UAS<sub>GAL1</sub>-10 $\Delta$ ::hphMX sin4 $\Delta$ 0::LEU2 MED3-FLAG::NatMX*

FY3100 *MAT $\alpha$  his3 $\Delta$ 200 ura3 $\Delta$ 0 leu2 $\Delta$ 0 lys2-128 $\delta$  bph1 $\Delta$ ::kanMX-UAS<sub>GAL1</sub> 799-HIS3*

*dug2Δ::TRP1-UAS<sub>GAL1</sub>806 UAS<sub>GAL1</sub>-10Δ::hphMX sin4Δ0::LEU2 mot3-1 grr1-1*  
 FY3101 *MATa his3Δ200 ura3Δ0 leu2Δ0 lys2-128δ bph1Δ::kanMX-UAS<sub>GAL1</sub>799 dug2*  
*Δ::TRP1-UAS<sub>GAL1</sub>806 UAS<sub>GAL1</sub>-10Δ::hphMX sin4Δ0::LEU2 mot3-1 grr1-1 MED3-*  
*FLAG::NatMX*  
 FY3102 *MATα his3Δ200 ura3Δ0 leu2Δ0 trp1Δ63 lys2-128δ sin4Δ0::LEU2 bph1Δ::kanMX-*  
*UAS<sub>GAL1</sub> 799-HIS3 dug2Δ::TRP1-UAS<sub>GAL1</sub>806 MOT3 grr1-1 sgm1-1 rim8-1 tma108-*  
*1 sgf73-1*  
 FY3103 *MATα his3Δ200 ura3Δ0 leu2Δ0 trp1Δ63 lys2-128δ sin4Δ0::LEU2 bph1Δ::kanMX-*  
*UAS<sub>GAL1</sub>799-HIS3 dug2Δ::TRP1-UAS<sub>GAL1</sub>806 mot3-1 GRR1 sgm1-1 rim8-1 tma108-*  
*1 sgf73-1*  
 FY3104 *MATα his3Δ200 ura3Δ0 leu2Δ0 trp1Δ63 lys2-128δ sin4Δ0::LEU2 bph1Δ::kanMX-*  
*UAS<sub>GAL1</sub> 799-HIS3 dug2Δ::TRP1-UAS<sub>GAL1</sub>806 mot3-1 grr1-1 SGM1 rim8-1 tma108-*  
*1 sgf73-1*  
 FY3105 *MATα his3Δ200 ura3Δ0 leu2Δ0 trp1Δ63 lys2-128δ sin4Δ0::LEU2 bph1Δ::kanMX-*  
*UAS<sub>GAL1</sub>799 dug2Δ::TRP1-UAS<sub>GAL1</sub>806-URA3 ptr3-1*  
 FY3106 *MATa his3Δ200 ura3Δ0 leu2Δ0 trp1Δ63 lys2-128δ sin4Δ0::LEU2 bph1Δ::kanMX-*  
*UAS<sub>GAL1</sub> 799-HIS3 dug2Δ::TRP1-UAS<sub>GAL1</sub>806-URA3 yor019w-1-1*  
 FY3107 *MATα his3Δ200 ura3Δ0 leu2Δ0 trp1Δ63 lys2-128δ sin4Δ0::LEU2 bph1Δ::kanMX-*  
*UAS<sub>GAL1</sub>799 dug2Δ::TRP1-UAS<sub>GAL1</sub>806-URA3 ptr3-1 yor019w-1*  
 FY3108 *MATα his3Δ200 ura3Δ0 leu2Δ0 trp1Δ63 lys2-128δ sin4Δ0::LEU2 bph1Δ::kanMX-*  
*UAS<sub>GAL1</sub> 799-HIS3 dug2Δ::TRP1-UAS<sub>GAL1</sub>806-URA3 mit1-1 ptr3-1 yor019w-1*  
 FY3109 *MATα his3Δ200 ura3Δ0 leu2Δ0 trp1Δ63 lys2-128δ sin4Δ0::LEU2 bph1Δ::kanMX-*  
*UAS<sub>GAL1</sub> 799-HIS3 dug2Δ::TRP1-UAS<sub>GAL1</sub>806-URA3 msn2-1 ptr3-1 yor019w-1*  
 FY2650 *MATa his3Δ200 lys2-128d leu2Δ0 ura3Δ0 trp1Δ63 sin4Δ0::LEU2 med3Δ0::LEU2*

*bph1Δ::kanMX-UAS<sub>GAL1</sub>799-HIS3*

FY2651 *MATa ade8-140 his3Δ200 lys2-128d leu2Δ0 ura3Δ0 trp1Δ63 sin4Δ0::LEU2*

*med2Δ0::URA3 bph1Δ::kanMX-UAS<sub>GAL1</sub>799-HIS3*

FY2657 *MATα ade8-140 his3Δ200 lys2-128d leu2Δ0 ura3Δ0 trp1Δ63 sin4Δ0::LEU2*

*cdk8Δ0::URA3 bph1Δ::kanMX-UAS<sub>GAL1</sub>799-HIS3*

---

Strains isolated during the mutant isolation are indicated by additional numbers in parentheses which indicate the stage when they were isolated. Lineage 1 has strains 1.0, 1.1, and 1.2, and lineage 2 has strains 2.0, 2.1, 2.2, 2.3a, and 2.3b.
