# Supplementary material
Source: PubMed Central journal article supplement (PMC4596672)
Supplement: 10.1534_115.181164_genetics.115.181164-8.pdf [file 10.1534_115.181164_genetics.115.181164-8.pdf]

**Table S5. Causal mutant candidates**

| Mutant strain | Candidate      | Amino acid | Causative? | Mutant reads/total read |
|---------------|----------------|------------|------------|-------------------------|
|               | gene           | change     |            |                         |
| FY3049 (1.2)  | <i>MOT3</i>    | N388H      | Yes        | 73/74                   |
|               | <i>GRR1</i>    | L181stop   | Yes        | 67/79                   |
|               | <i>SGM1</i>    | L407S      | No         | 79/95                   |
|               | <i>SGF73</i>   | P84L       | No         | 46/69                   |
|               | <i>TMA108</i>  | A458V      | No         | 42/67                   |
|               | <i>RIM8</i>    | P52L       | No         | 46/68                   |
| FY3052 (2.3a) | <i>PTR3</i>    | S363stop   | Yes        | 68/68                   |
|               | <i>YOR019W</i> | N553K      | Weakly     | 48/97                   |
|               | <i>MIT1</i>    | H187R      | Yes        | 81/81                   |
| FY3053 (2.3b) | <i>PTR3</i>    | N553K      | Yes        | 231/235                 |
|               | <i>YOR019W</i> | N553K      | Weakly     | 62/259                  |
|               | <i>MSN2</i>    | C652stop   | Yes        | 252/252                 |

Causality was determined by allele replacement for most of the listed mutations as described in Materials and Methods. For three mutations, in *SGF73*, *TMA108*, and *RIM8*, allele replacement was not done. Instead, these mutations were tested during reconstruction of the polygenic mutant and were shown to not confer any mutant phenotype.
