# Supplementary material
Source: PubMed Central journal article supplement (PMC4596672)
Supplement: 10.1534_115.181164_genetics.115.181164-9.pdf [file 10.1534_115.181164_genetics.115.181164-9.pdf]

**Table S4. Sequencing coverage of segregant pools**

| <b>Cross</b>              | <b>Segregants</b> | <b>Pool size<br/>(segregants)</b> | <b>Number of<br/>mapped reads</b> | <b>Fold coverage</b> |
|---------------------------|-------------------|-----------------------------------|-----------------------------------|----------------------|
| FY3049 (1.2) x<br>FY3046  | Wild type         | 45                                | 12,115,678                        | 89                   |
|                           | Mutant            | 45                                | 12,364,877                        | 85                   |
| FY3052 (2.3a) x<br>FY3047 | Wild type         | 48                                | 13,097,764                        | 101                  |
|                           | Mutant            | 48                                | 14,174,495                        | 97                   |
| FY3053 (2.3b) x<br>FY3047 | Wild type         | 42                                | 11,391,104                        | 80                   |
|                           | Mutant            | 42                                | 38,280,078                        | 260                  |

In each cross, wild-type segregants were those that were sensitive to 1 mM 3AT and mutant segregants were those resistant to 10 mM 3AT.
