# Supplementary material
Source: PubMed Central journal article supplement (PMC4596672)
Supplement: 10.1534_115.181164_genetics.115.181164-10.pdf [file 10.1534_115.181164_genetics.115.181164-10.pdf]

## File S1

PERL script to calculate the frequency of all SNPs in two matched pools

```
# Usage: cerevisiae_VCF_diff <vcf-file> <min-counts> <min-fraction>
# Input file must be a VCF file created from two samples (e.g., WT and mutant).
# When calling the function, the user must specify the minimum reads needed in
each sample
# (this study used 10) and the minimum fraction of an alternative allele
observed in either
# of the two samples (this study used 0.5).
# This program will ask which column is the WT and which column is the mutant.
# Output file is a tab-delimited file with same name as input file, plus the
date.
# Output file contains the allele descriptions and their counts.
# "FRACTION_DIFF_REF" shows the fraction difference of the reference allele: WT
minus mutant.
# The closer this value is to 1 (or -1), the greater the difference between WT
and mutant.

#!/usr/bin/perl
use warnings;
use strict;
use List::Util qw( min max );

my $input = shift;
my $date = ((localtime)[5]+1900)."_" . ((localtime)[4]+1)."_" . ((localtime)[3]);
my $output = $input.$date.".txt";

open IN, $input or die $!;
open OUT, ">$output" or die $!;
select OUT;

my $min_num = shift;
my $min_fraction = shift;

my
%chr=(chrI=>1,chrII=>2,chrIII=>3,chrIV=>4,chrV=>5,chrVI=>6,chrVII=>7,chrVIII=>8,
      chrIX=>9,chrX=>10,chrXI=>11,chrXII=>12,chrXIII=>13,chrXIV=>14,chrXV=>15,chr
rXVI=>16,chrMito=>17,"2-micron"=>18);
my %column;

$/="\n";

my $labels = join "\t", qw/CHROM POS REF_ALLELE ALT_ALLELE1 ALT_ALLELE2
ALT_ALLELE3 NUM_REF_WT NUM_ALT1_WT NUM_ALT2_WT NUM_ALT3_WT NUM_REF_MUT
NUM_ALT1_MUT NUM_ALT2_MUT NUM_ALT3_MUT FRACTION_DIFF_REF/;
print $labels,"\n";

my $WT_column = "-1";
my $mutant_column = "-1";

while (<IN>) {
    my @row = split /\t/, $_;
```

```

my @new_row;

# Meta-information lines
if ($row[0] =~ /^##/) {next;}

# header line: determine order of columns
elsif ($row[0] =~ /^#[A-Za-z0-9]/) {
    my $count=0;

    for (@row) {
        print STDOUT "$count: $_\n";
        $column{$_} = $count;
        $count++;
    }
    print STDOUT "Which column is the WT sample? ";
    chomp ($WT_column = <STDIN>);
    print STDOUT "Which column is the mutant sample? ";
    chomp ($mutant_column = <STDIN>);
    next;
}

# data line (i.e., with mutation)
else {
    $new_row[0] = $chr{$row[$column{"#CHROM"}]};
    $new_row[1] = $row[$column{POS}];
    $new_row[2] = $row[$column{REF}];

    my @MUTATIONS = split /,/, $row[$column{ALT}];
    if (!defined$MUTATIONS[0] || ($MUTATIONS[0] eq "."))
    {$new_row[3] = "";}
    else {$new_row[3]=$MUTATIONS[0];}
    if (!defined$MUTATIONS[1] || ($MUTATIONS[1] eq "."))
    {$new_row[4] = "";}
    else {$new_row[4]=$MUTATIONS[1];}
    if (!defined$MUTATIONS[2] || ($MUTATIONS[2] eq "."))
    {$new_row[5] = "";}
    else {$new_row[5]=$MUTATIONS[2];}

    my %format_column;
    my @format = split /:/, $row[$column{FORMAT}];
    my $count=0;
    my $RA="RA"; my $AA="AA";
    for (@format) {
        $format_column{$_} = $count;
        if ($_ eq "RO") { $RA = "RO"; }
        if ($_ eq "AO") { $AA = "AO"; }
        $count++;
    }

    if ($row[$WT_column] =~ /:/) {
        my @WT = split /:/, $row[$WT_column];
        chomp (@WT);
        $new_row[6] = $WT[$format_column{$RA}];
        my @AA1 = split /,/, $WT[$format_column{$AA}];
    }
}

```

```

        if (!defined$AA1[0] || ($AA1[0] eq "."))      {$new_row[7] =
0;}
        else {$new_row[7]=$AA1[0];}
        if (!defined$AA1[1] || ($AA1[1] eq "."))      {$new_row[8] =
0;}
        else {$new_row[8]=$AA1[1];}
        if (!defined$AA1[2] || ($AA1[2] eq "."))      {$new_row[9] =
0;}
        else {$new_row[9]=$AA1[2];}
    }
    else {
        @new_row[6..9] = ("?", "?", "?", "?");
    }

    if ($row[$mutant_column] =~ /:/) {
        my @MUT = split /:/, $row[$mutant_column];
        chomp (@MUT);
        $new_row[10] = $MUT[$format_column{$RA}];
        my @AA2 = split /,/, $MUT[$format_column{$AA}];
0;}
        if (!defined$AA2[0] || ($AA2[0] eq "."))      {$new_row[11] =
0;}
        else {$new_row[11]=$AA2[0];}
        if (!defined$AA2[1] || ($AA2[1] eq "."))      {$new_row[12] =
0;}
        else {$new_row[12]=$AA2[1];}
        if (!defined$AA2[2] || ($AA2[2] eq "."))      {$new_row[13] =
0;}
        else {$new_row[13]=$AA2[2];}
    }
    else {
        @new_row[10..13] = ("?", "?", "?", "?");
    }
}

my $WT_sum = 0;
my $mut_sum = 0;

for (@new_row[6..9]) {
    if ($_ ne "?") {$WT_sum=$WT_sum+$_;}
}
for (@new_row[10..13]) {
    if ($_ ne "?") {$mut_sum=$mut_sum+$_;}
}

if ( $WT_sum >= $min_num && $mut_sum >= $min_num ) {
    if ( ( ( max(@new_row[7..9]) / $WT_sum) >= $min_fraction) ||
( ( max(@new_row[11..13]) / $mut_sum) >= $min_fraction) ) {
        $new_row[14] = ($new_row[6]/$WT_sum)-($new_row[10]/$mut_sum);
        my $line = join "\t", @new_row;
        print $line, "\n";
    }
}
}
}

```
