# Supplementary material
Source: PubMed Central journal article supplement (PMC4596672)
Supplement: 10.1534_115.181164_genetics.115.181164-11.pdf [file 10.1534_115.181164_genetics.115.181164-11.pdf]

**Table S7. Adjacent gene pairs enrichment**

|           |                                       | Promoter Orientation |    |          |           |    |          |        |    |          |
|-----------|---------------------------------------|----------------------|----|----------|-----------|----|----------|--------|----|----------|
|           |                                       | Convergent           |    |          | Divergent |    |          | Tandem |    |          |
|           |                                       | E                    | O  | p-value  | E         | O  | p-value  | E      | O  | p-value  |
| Raffinose | 1.2                                   | 2.75                 | 8  | 2.10E-03 | 1.87      | 15 | 1.90E-10 | 6.07   | 22 | 1.20E-07 |
|           | <i>sin4Δ0</i><br><i>mot3-1 grr1-1</i> | 0.613                | 4  | 4.30E-04 | 0.344     | 4  | 3.00E-05 | 0.943  | 5  | 4.40E-04 |
|           | 2.3a                                  | 1.08                 | 2  | 9.50E-02 | 0.636     | 5  | 5.40E-05 | 1.85   | 11 | 6.30E-07 |
|           | 2.3b                                  | 0.873                | 4  | 2.10E-03 | 0.514     | 8  | 4.30E-09 | 1.91   | 9  | 3.20E-05 |
| Glucose   | 1.2                                   | 5.77                 | 19 | 3.00E-06 | 3.63      | 18 | 1.10E-08 | 4.87   | 23 | 4.80E-10 |
|           | <i>sin4Δ0</i><br><i>mot3-1 grr1-1</i> | 0.760                | 5  | 1.40E-04 | 0.488     | 3  | 1.60E-03 | 0.340  | 4  | 2.90E-05 |
|           | 2.3a                                  | 0.726                | 5  | 1.10E-04 | 0.323     | 3  | 3.50E-04 | 0.468  | 8  | 2.00E-09 |
|           | 2.3b                                  | 1.02                 | 7  | 1.20E-05 | 0.424     | 5  | 5.70E-06 | 0.726  | 8  | 8.00E-08 |
| Galactose | 1.2                                   | 6.07                 | 22 | 1.20E-07 | 11.89     | 24 | 6.00E-04 | 14.99  | 35 | 2.90E-06 |
|           | <i>sin4Δ0</i><br><i>mot3-1 grr1-1</i> | 0.943                | 5  | 4.40E-04 | 2.238     | 9  | 1.20E-04 | 0.754  | 4  | 1.10E-03 |
|           | 2.3a                                  | 1.85                 | 11 | 6.30E-07 | 1.40      | 8  | 1.60E-05 | 1.40   | 11 | 3.20E-08 |
|           | 2.3b                                  | 1.91                 | 9  | 3.20E-05 | 1.77      | 10 | 2.70E-06 | 2.08   | 16 | 1.00E-10 |

Shown for each strains are the expected number (E) of adjacent gene pairs upregulated given the overall number of upregulated genes, the observed (O) number of upregulated gene pairs, and the p-value for the significance in difference between observed and expected. Analysis was performed for convergent, divergent, and tandem promoter orientation when the strains are grown in YP medium with the indicated carbon sources. The actual strains used are as follows: 1.2, FY3056; *sin4Δ0 mot3-1 grr1-1*, FY3061; 2.3a, FY3057; 2.3b, FY3058.
